# Supplementary material for: Identification of Auxin Metabolites in Brassicaceae by Ultra-Performance Liquid Chromatography Coupled with High-Resolution Mass Spectrometry
Source: PubMed Central journal article supplement (PMC6680779; doi:10.3390/molecules24142615), 2019-07-18
Supplement: molecules-24-02615-s001.pdf [file molecules-24-02615-s001.pdf]

## Supplemental Materials

for

### Identification of auxin metabolites in Brassicaceae by ultra-pressure liquid chromatography coupled with high resolution mass spectrometry

Panagiota-Kyriaki Revelou, Maroula G. Kokotou, Violetta Constantinou-Kokotou \*

*Chemical Laboratories, Department of Food Science and Human Nutrition, Agricultural University of Athens, Iera odos 75, Athens 11855, Greece*

#### Contents

**Fig. S1** Full scan (a) and MS/MS spectra (b) of indole-3-acetic acid under negative ESI mode. Full scan (c) and MS/MS spectra (d) of indole-3-acetic acid under positive ESI mode

**Fig. S2** Full scan (a) and MS/MS spectra (b) of 4-chloroindole-3-acetic acid under negative ESI mode. Full scan (c) and MS/MS spectra (d) of 4-chloroindole-3-acetic acid under positive ESI mode

**Fig. S3** Full scan (a) and MS/MS spectra (b) of indole-3-aldehyde under negative ESI mode. Full scan (c) and MS/MS spectra (d) of indole-3-aldehyde under positive ESI mode

**Fig. S4** Full scan (a) and MS/MS spectra (b) of indole-3-acetonitrile under negative ESI mode. Full scan (c) and MS/MS spectra (d) of indole-3-acetonitrile under positive ESI mode

**Fig. S5** Full scan (a) and MS/MS spectra (b) of indole-3-acetamide under negative ESI mode. Full scan (c) and MS/MS spectra (d) of indole-3-acetamide under positive ESI mode

**Fig. S6** Full scan (a) and MS/MS spectra (b) of indole-3-acetyl-L-alanine under negative ESI mode. Full scan (c) and MS/MS spectra (d) of indole-3-acetyl-L-alanine under positive ESI mode

**Fig. S7** Full scan (a) and MS/MS spectra (b) of indole-3-acetyl-L-alanine methyl ester under negative ESI mode. Full scan (c) and MS/MS spectra (d) of indole-3-acetyl-L-alanine methyl ester under positive ESI mode

**Fig. S8** Full scan (a) and MS/MS spectra (b) of indole-3-acetyl-L-glutamic acid under negative ESI mode. Full scan (c) and MS/MS spectra (d) of indole-3-acetyl-L-glutamic acid under positive ESI mode

**Fig. S9** Full scan (a) and MS/MS spectra (b) of indole-3-acetyl-L-glutamic acid dimethyl ester under negative ESI mode. Full scan (c) and MS/MS spectra (d) of indole-3-acetyl-L-glutamic acid dimethyl ester under positive ESI mode

**Fig. S10** Full scan (a) and MS/MS spectra (b) of indole-3-acetyl-glycine under negative ESI mode. Full scan (c) and MS/MS spectra (d) of indole-3-acetyl-glycine under positive ESI mode

**Fig. S11** Full scan (a) and MS/MS spectra (b) of indole-3-acetyl-glycine methyl ester under negative ESI mode. Full scan (c) and MS/MS spectra (d) of indole-3-acetyl-glycine methyl ester under positive ESI mode

**Fig. S12** Full scan (a) and MS/MS spectra (b) of indole-3-acetyl-L-methionine under negative ESI mode. Full scan (c) and MS/MS spectra (d) of indole-3-acetyl-L-methionine under positive ESI mode

**Fig. S13** Full scan (a) and MS/MS spectra (b) of indole-3-acetyl-L-methionine methyl ester under negative ESI mode. Full scan (c) and MS/MS spectra (d) of indole-3-acetyl-L-methionine methyl ester under positive ESI mode

**Fig. S14** Full scan (a) and MS/MS spectra (b) of indole-3-acetyl-L-phenylalanine under negative ESI mode. Full scan (c) and MS/MS spectra (d) of indole-3-acetyl-L-phenylalanine under positive ESI mode

**Fig. S15** Full scan (a) and MS/MS spectra (b) of indole-3-acetyl-L-phenylalanine methyl ester under negative ESI mode. Full scan (c) and MS/MS spectra (d) of indole-3-acetyl-L-phenylalanine methyl ester under positive ESI mode

**Fig. S16** Full scan (a) and MS/MS spectra (b) of indole-3-acetyl-L-tryptophan under negative ESI mode. Full scan (c) and MS/MS spectra (d) of indole-3-acetyl-L-tryptophan under positive ESI mode

**Fig. S17** Full scan (a) and MS/MS spectra (b) of indole-3-acetyl-L-tryptophan methyl ester under negative ESI mode. Full scan (c) and MS/MS spectra (d) of indole-3-acetyl-L-tryptophan methyl ester under positive ESI mode

**Fig. S18** Full scan (a) and MS/MS spectra (b) of indole-3-acetyl-L-tyrosine under negative ESI mode. Full scan (c) and MS/MS spectra (d) of indole-3-acetyl-L-tyrosine under positive ESI mode

**Fig. S19** Full scan (a) and MS/MS spectra (b) of indole-3-acetyl-L-tyrosine methyl ester under negative ESI mode. Full scan (c) and MS/MS spectra (d) of indole-3-acetyl-L-tyrosine methyl ester under positive ESI mode

**Fig. S20** Full scan (a) and MS/MS spectra (b) of indole-3-acetyl-L-valine under negative ESI mode. Full scan (c) and MS/MS spectra (d) of indole-3-acetyl-L-valine under positive ESI mode

**Fig. S21** Full scan (a) and MS/MS spectra (b) of indole-3-acetyl-L-valine methyl ester under negative ESI mode. Full scan (c) and MS/MS spectra (d) of indole-3-acetyl-L-valine methyl ester under positive ESI mode

**Fig. S22** Full scan (a) and MS/MS spectra (b) of indole-3-acetyl-L-aspartic acid under negative ESI mode. Full scan (c) and MS/MS spectra (d) of indole-3-acetyl-L-aspartic acid under positive ESI mode

**Fig. S23** Full scan (a) and MS/MS spectra (b) of indole-3-acetyl-L-aspartic acid dimethyl ester under negative ESI mode. Full scan (c) and MS/MS spectra (d) of indole-3-acetyl-L-aspartic acid dimethyl ester under positive ESI mode

**Fig. S24** Extracted ion chromatograms of studied compounds in negative ESI mode

**Table S1** MS data of the identification of studied compounds in *B. oleracea* var. *capitata*

**Table S2** MS data of the identification of studied compounds in *B. oleracea* var. *rubra*

**Table S3** MS data of the identification of studied compounds in *B. rapa* subsp. *rapifera*

**Table S4** MS data of the identification of studied compounds in *B. oleracea* var. *botrytis* cv. zarka

**Table S5** MS data of the identification of studied compounds in *B. oleracea* var. *italica* cv. calabrese

**Table S6** MS data of the identification of studied compounds in *B. oleracea* var. *italica* cv. violleto

**Table S7** MS data of the identification of studied compounds in *R. raphanistrum* subsp. *sativus*

**Table S8** MS data of the identification of studied compounds in *E. sativa*

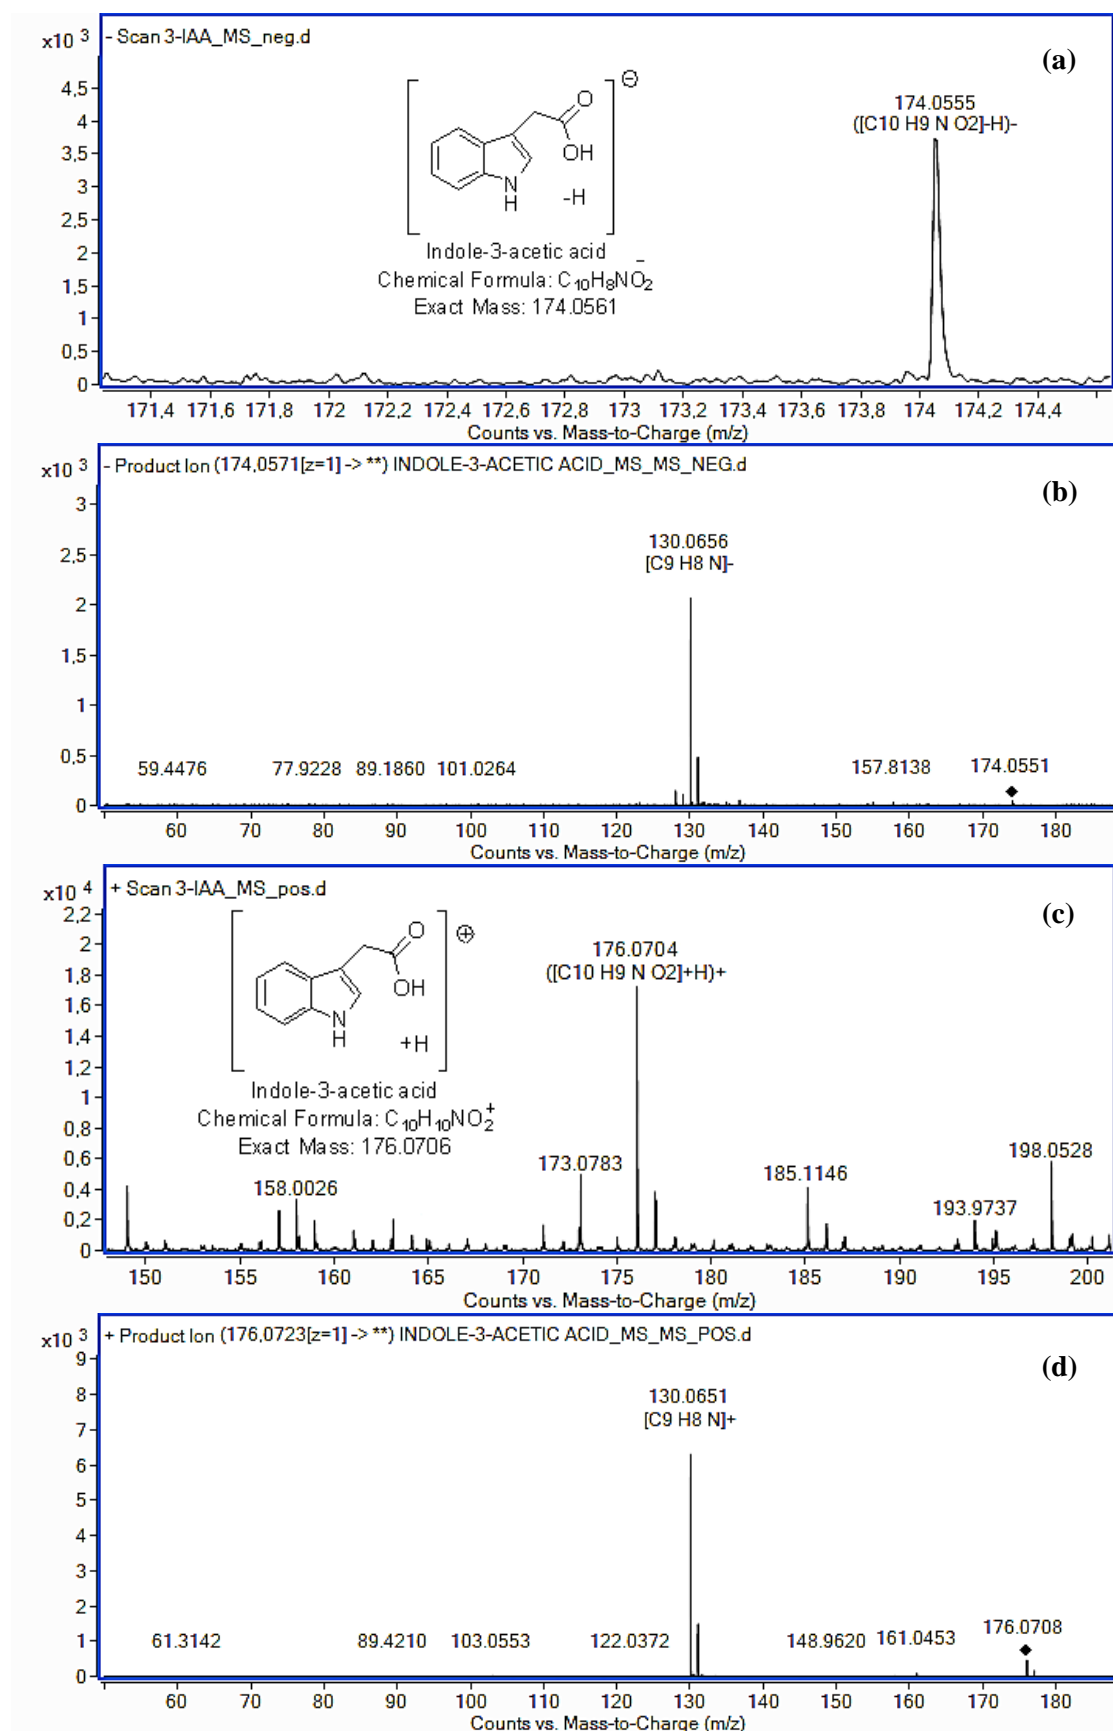

**Fig. S1** Full scan (a) and MS/MS spectra (b) of indole-3-acetic acid under negative ESI mode. Full scan (c) and MS/MS spectra (d) of indole-3-acetic acid under positive ESI mode

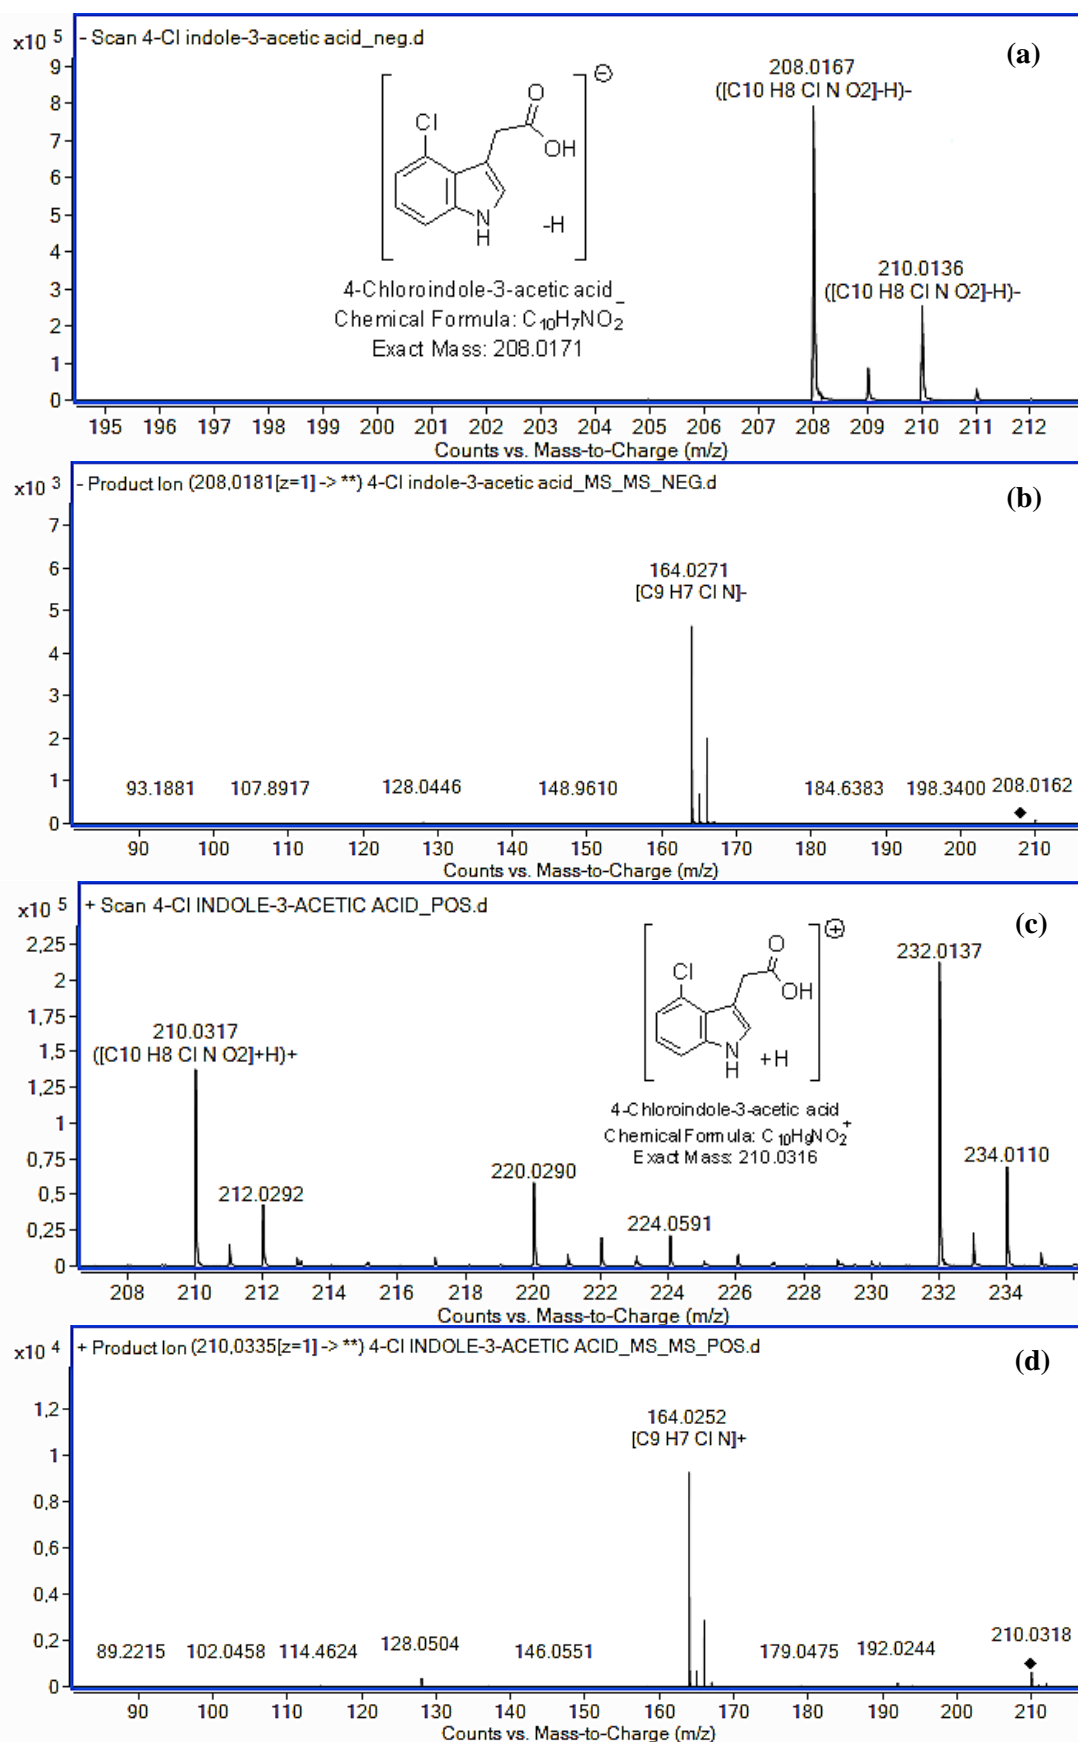

**Fig. S2** Full scan (a) and MS/MS spectra (b) of 4-chloroindole-3-acetic acid under negative ESI mode. Full scan (c) and MS/MS spectra (d) of 4-chloroindole-3-acetic acid under positive ESI mode

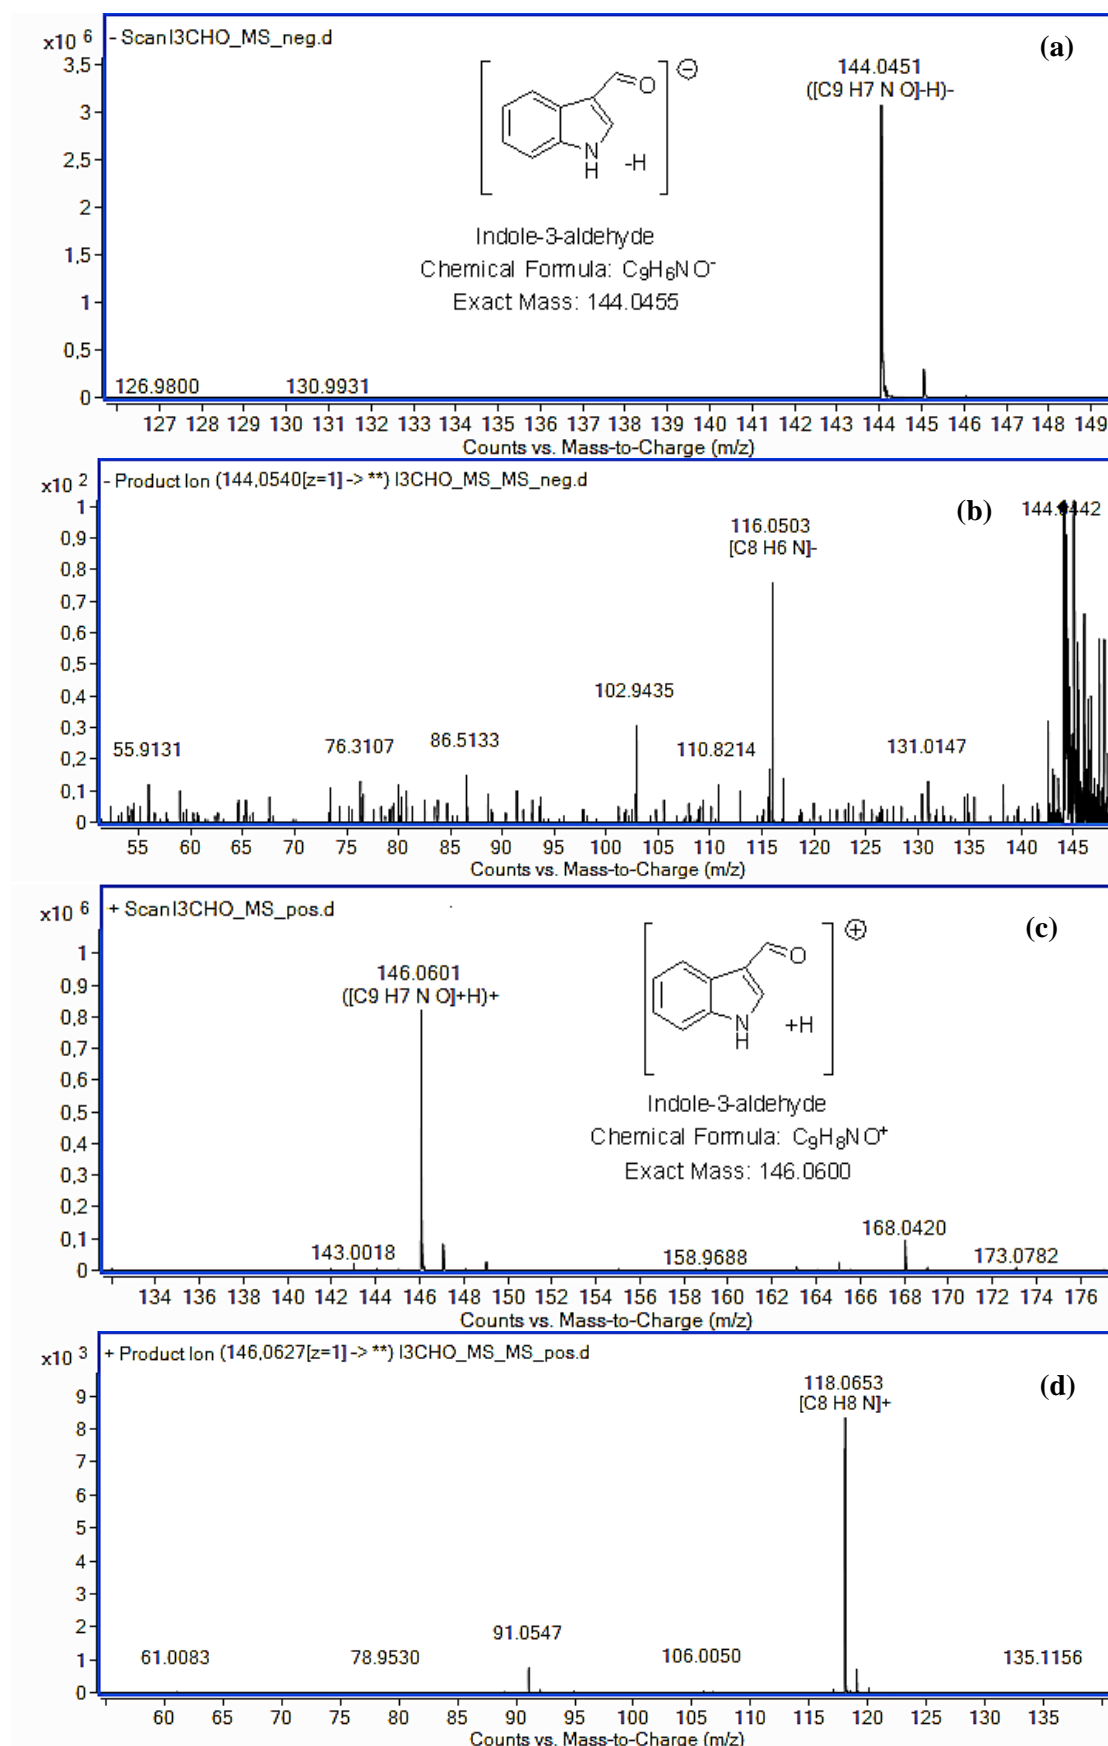

**Fig. S3** Full scan (a) and MS/MS spectra (b) of indole-3-aldehyde under negative ESI mode. Full scan (c) and MS/MS spectra (d) of indole-3-aldehyde under positive ESI mode

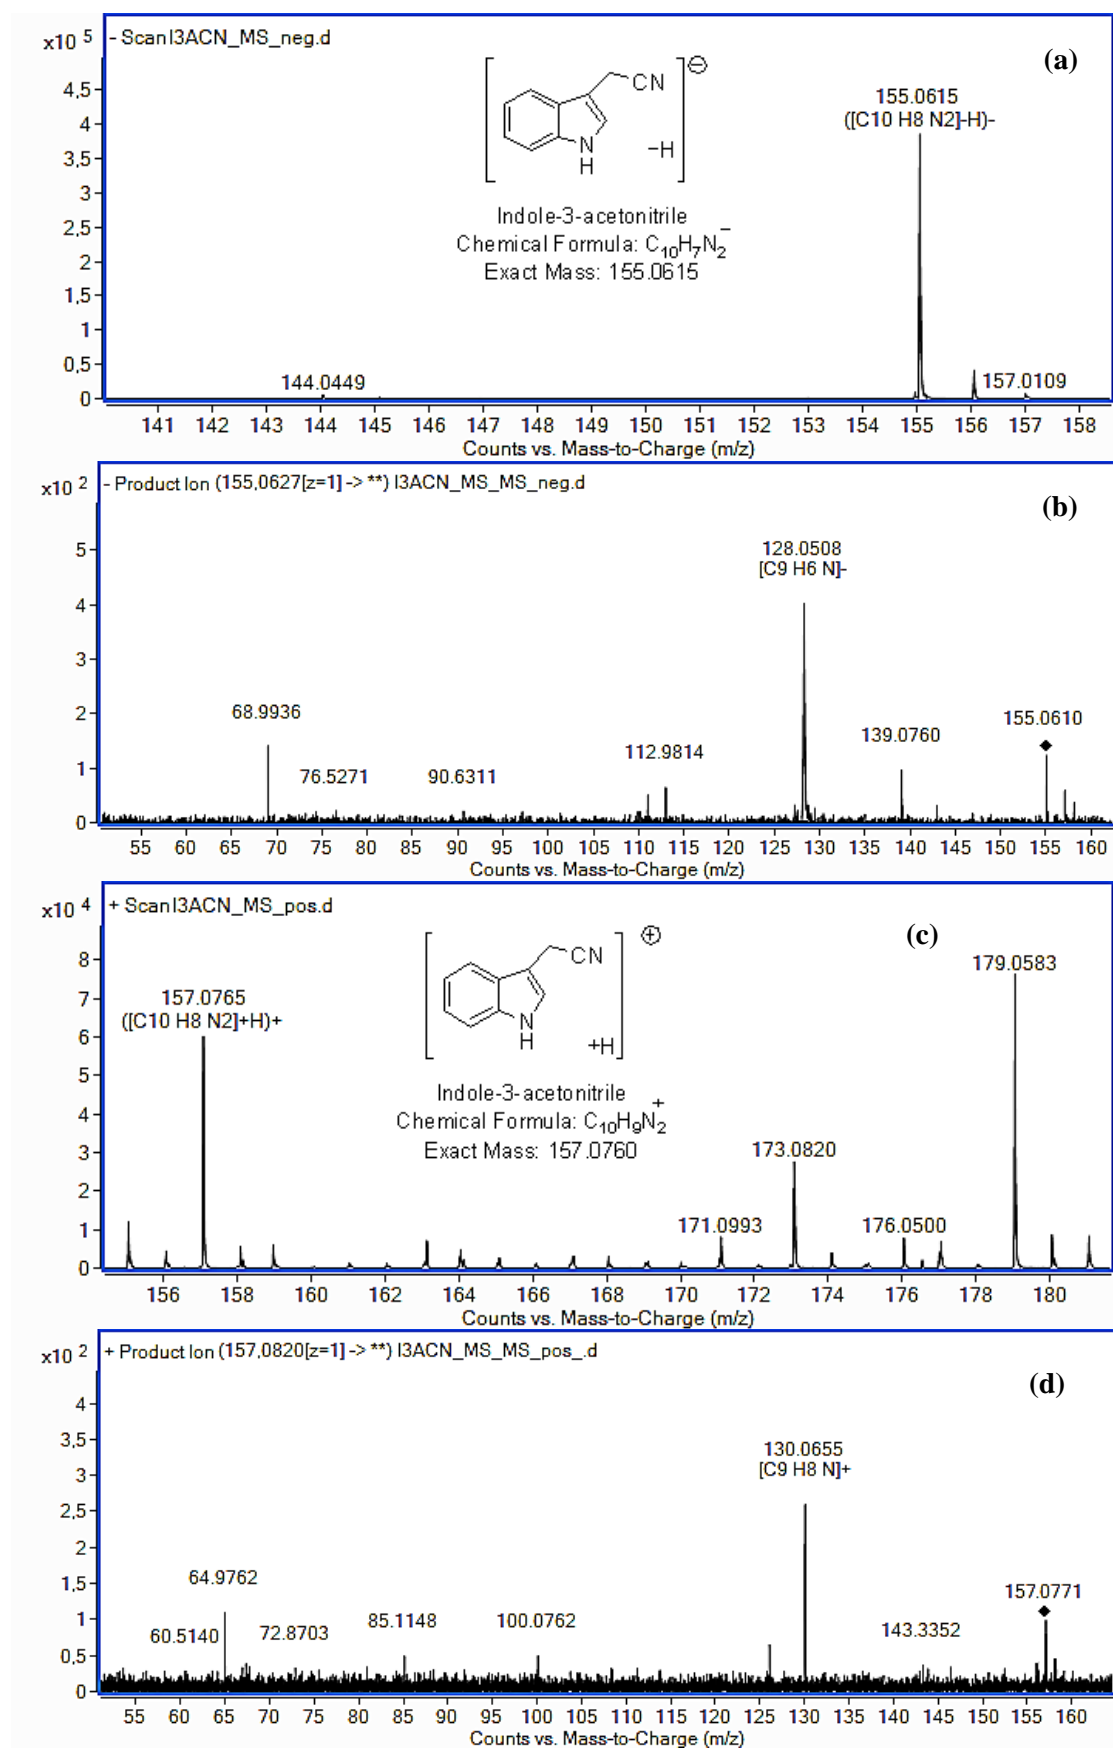

**Fig. S4** Full scan (a) and MS/MS spectra (b) of indole-3-acetonitrile under negative ESI mode. Full scan (c) and MS/MS spectra (d) of indole-3-acetonitrile under positive ESI mode

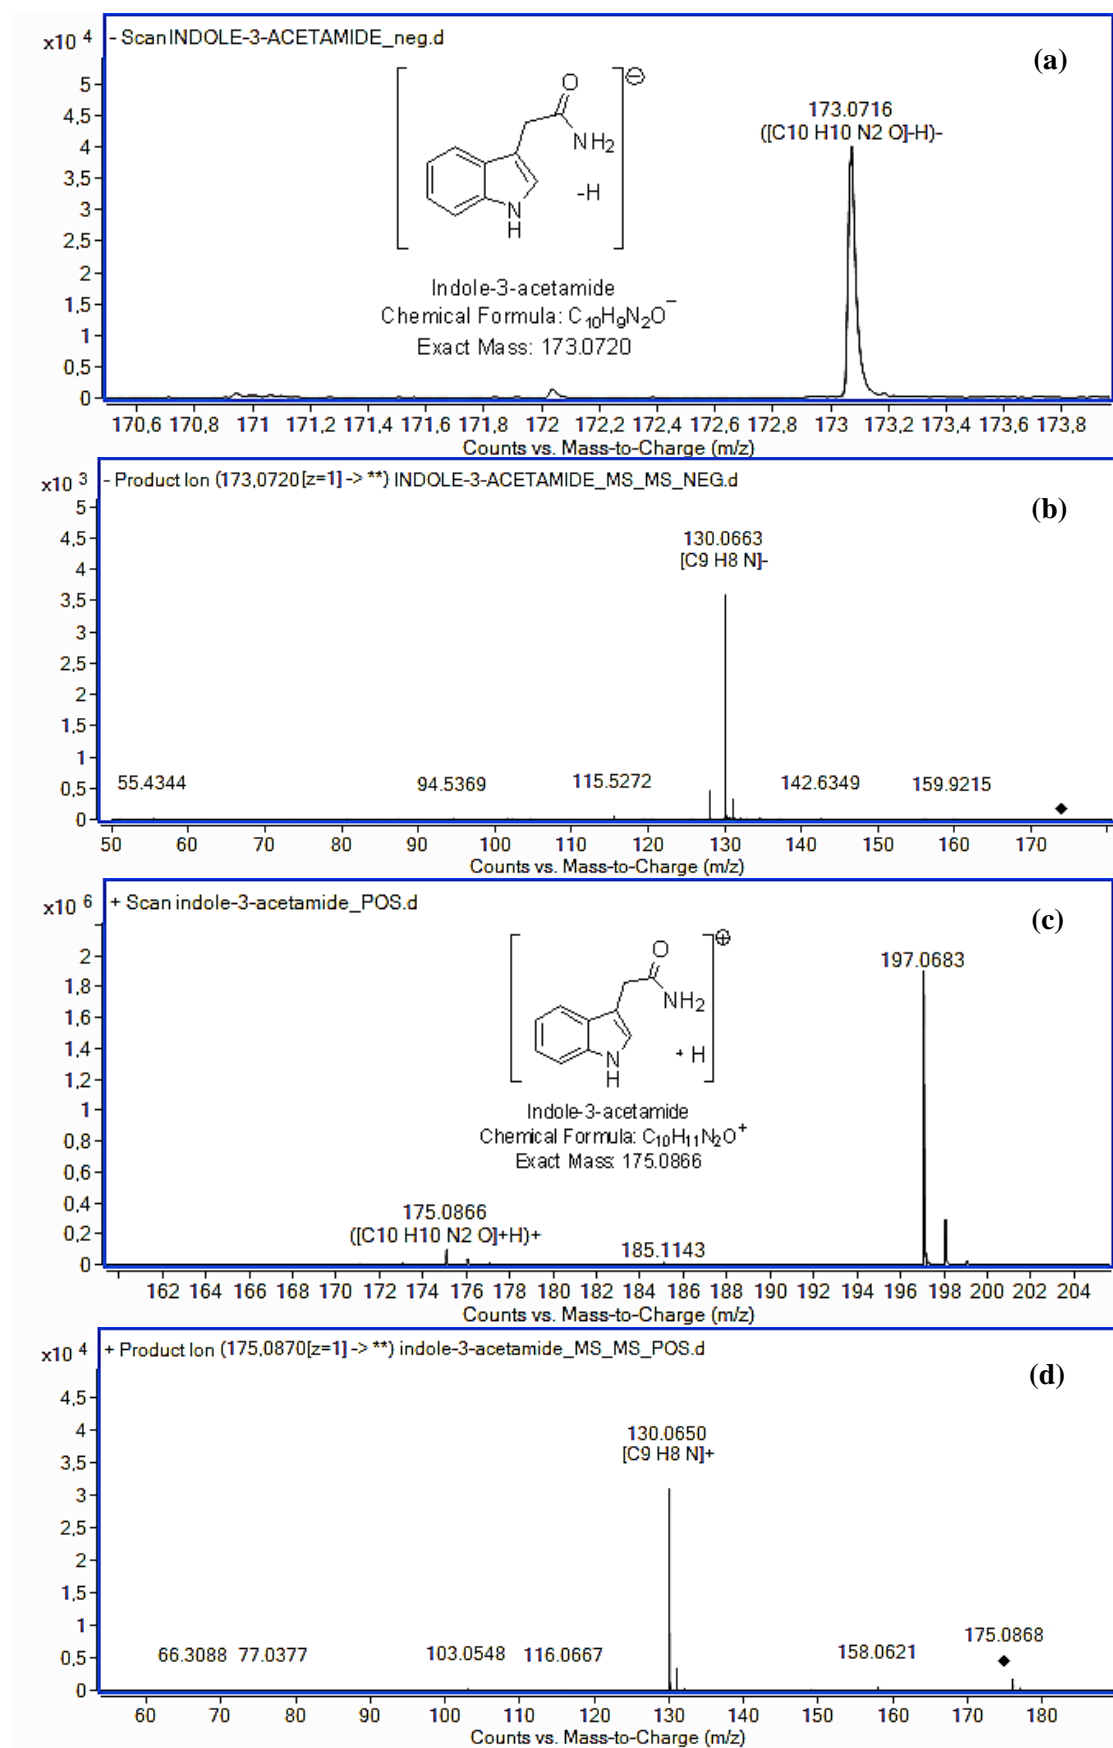

**Fig. S5** Full scan (a) and MS/MS spectra (b) of indole-3-acetamide under negative ESI mode. Full scan (c) and MS/MS spectra (d) of indole-3-acetamide under positive ESI mode



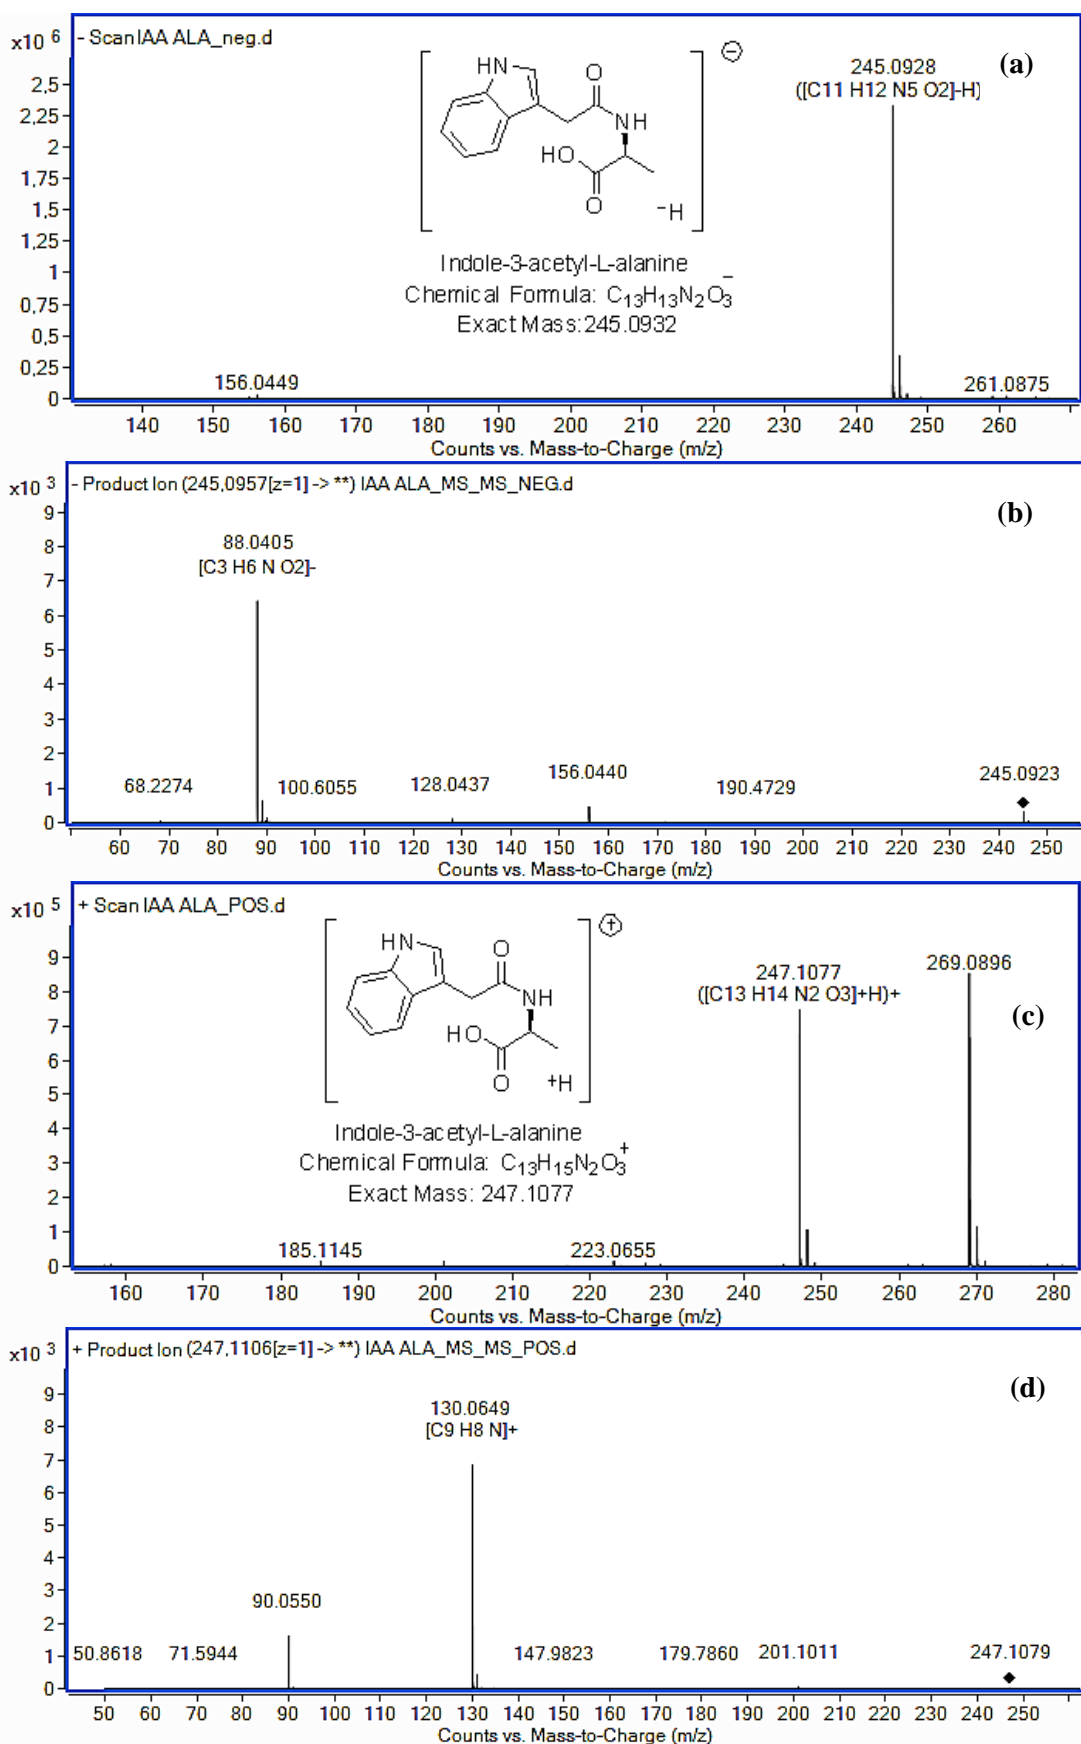

**Fig. S6** Full scan (a) and MS/MS spectra (b) of indole-3-acetyl-L-alanine under negative ESI mode. Full scan (c) and MS/MS spectra (d) of indole-3-acetyl-L-alanine under positive ESI mode

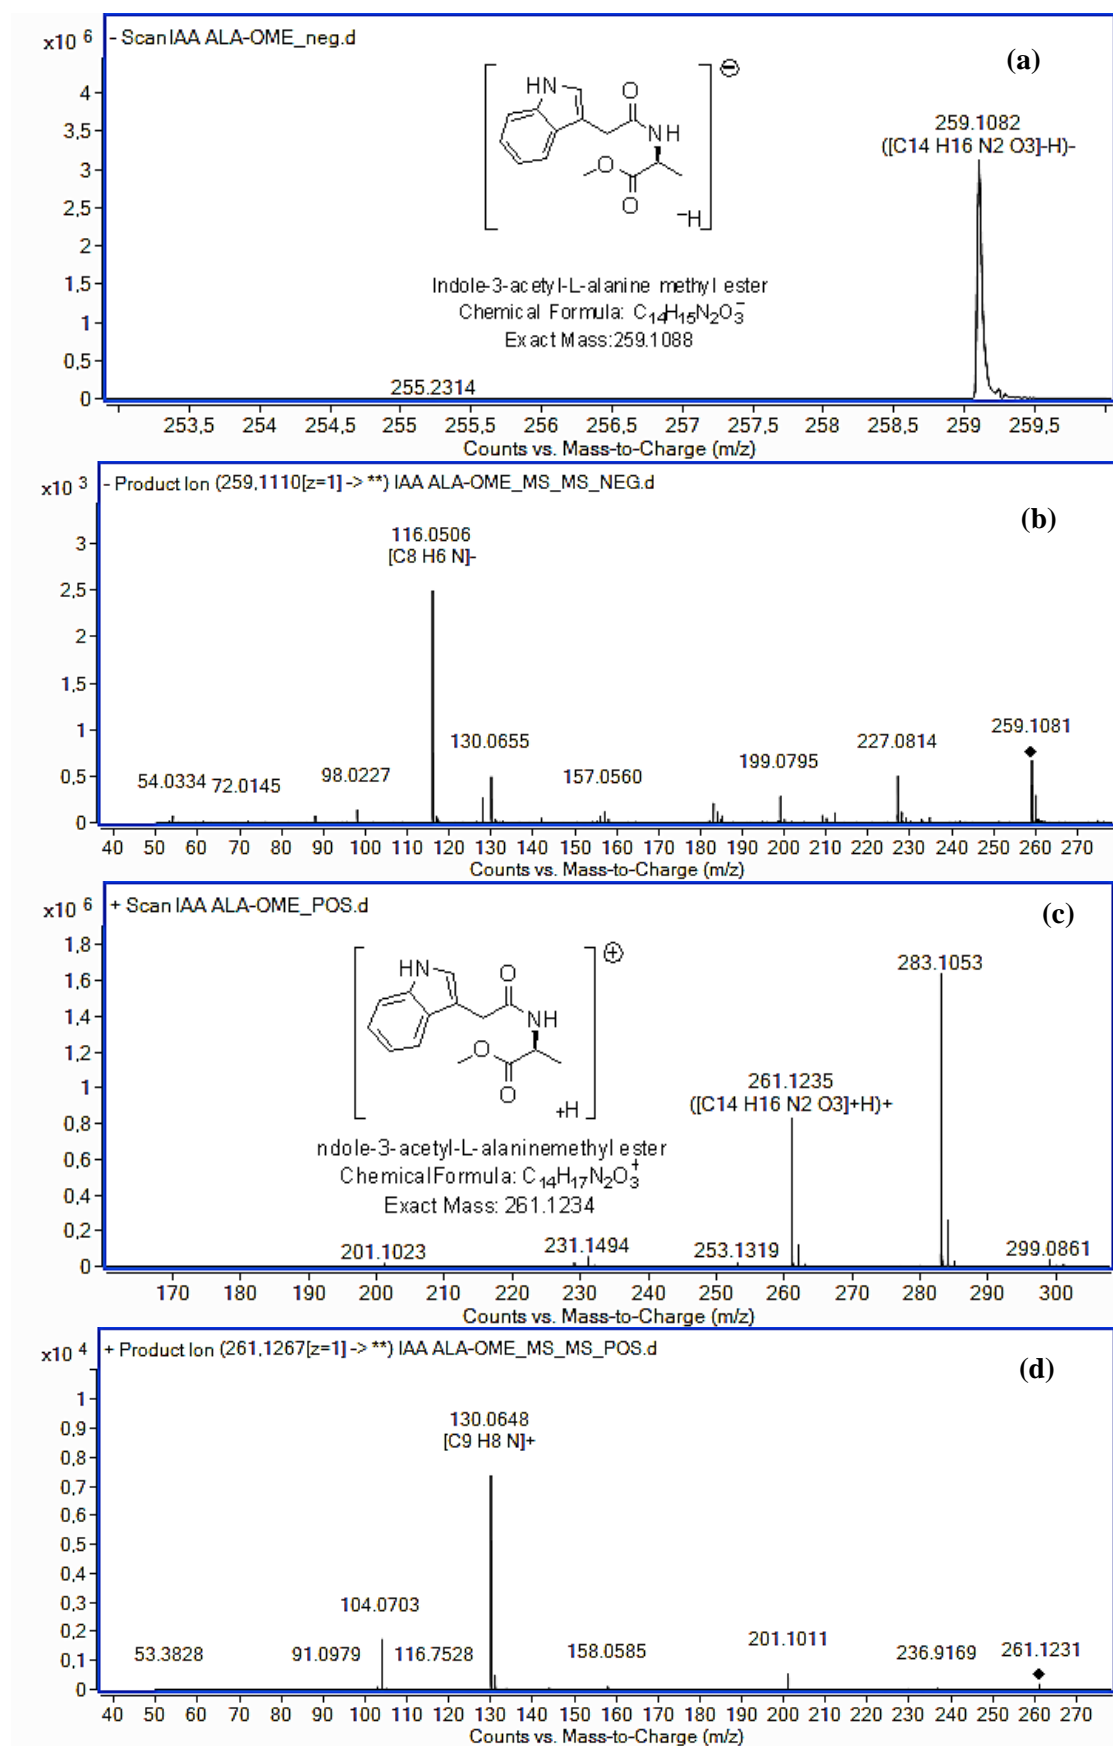

**Fig. S7** Full scan (a) and MS/MS spectra (b) of indole-3-acetyl-L-alanine methyl ester under negative ESI mode. Full scan (c) and MS/MS spectra (d) of indole-3-acetyl-L-alanine methyl ester under positive ESI mode

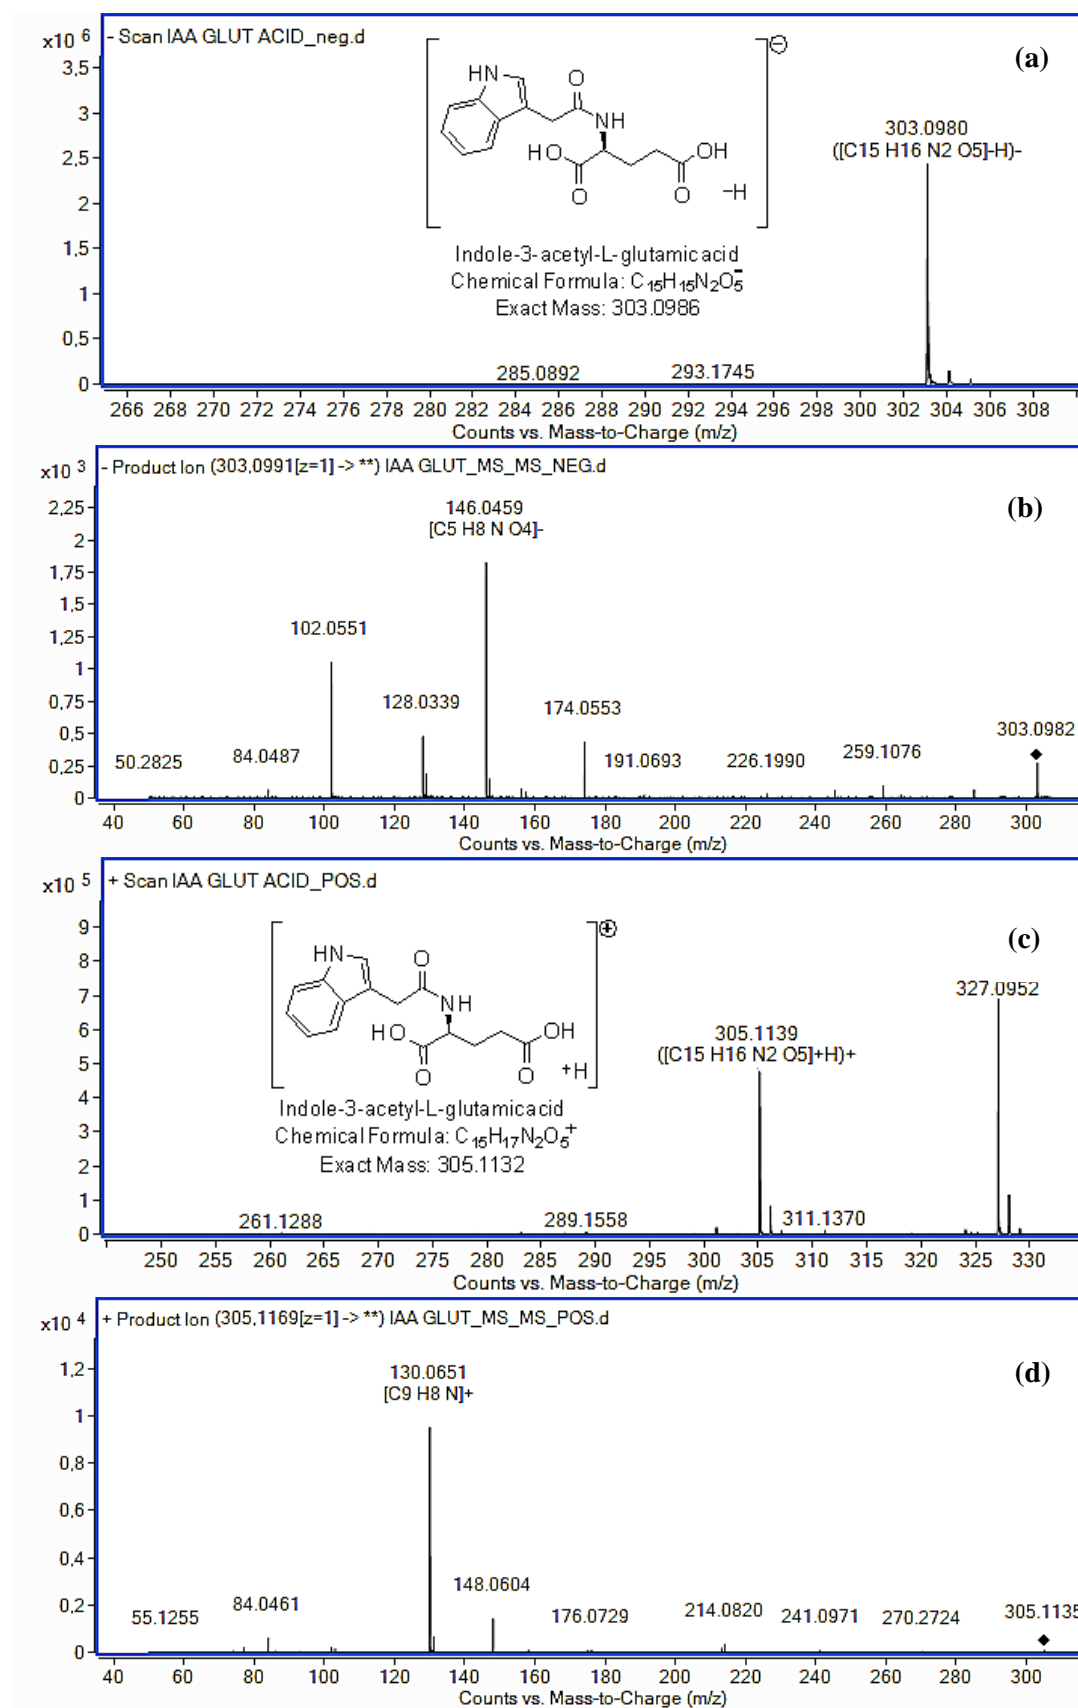

**Fig. S8** Full scan (a) and MS/MS spectra (b) of indole-3-acetyl-L-glutamic acid under negative ESI mode. Full scan (c) and MS/MS spectra (d) of indole-3-acetyl-L-glutamic acid under positive ESI mode

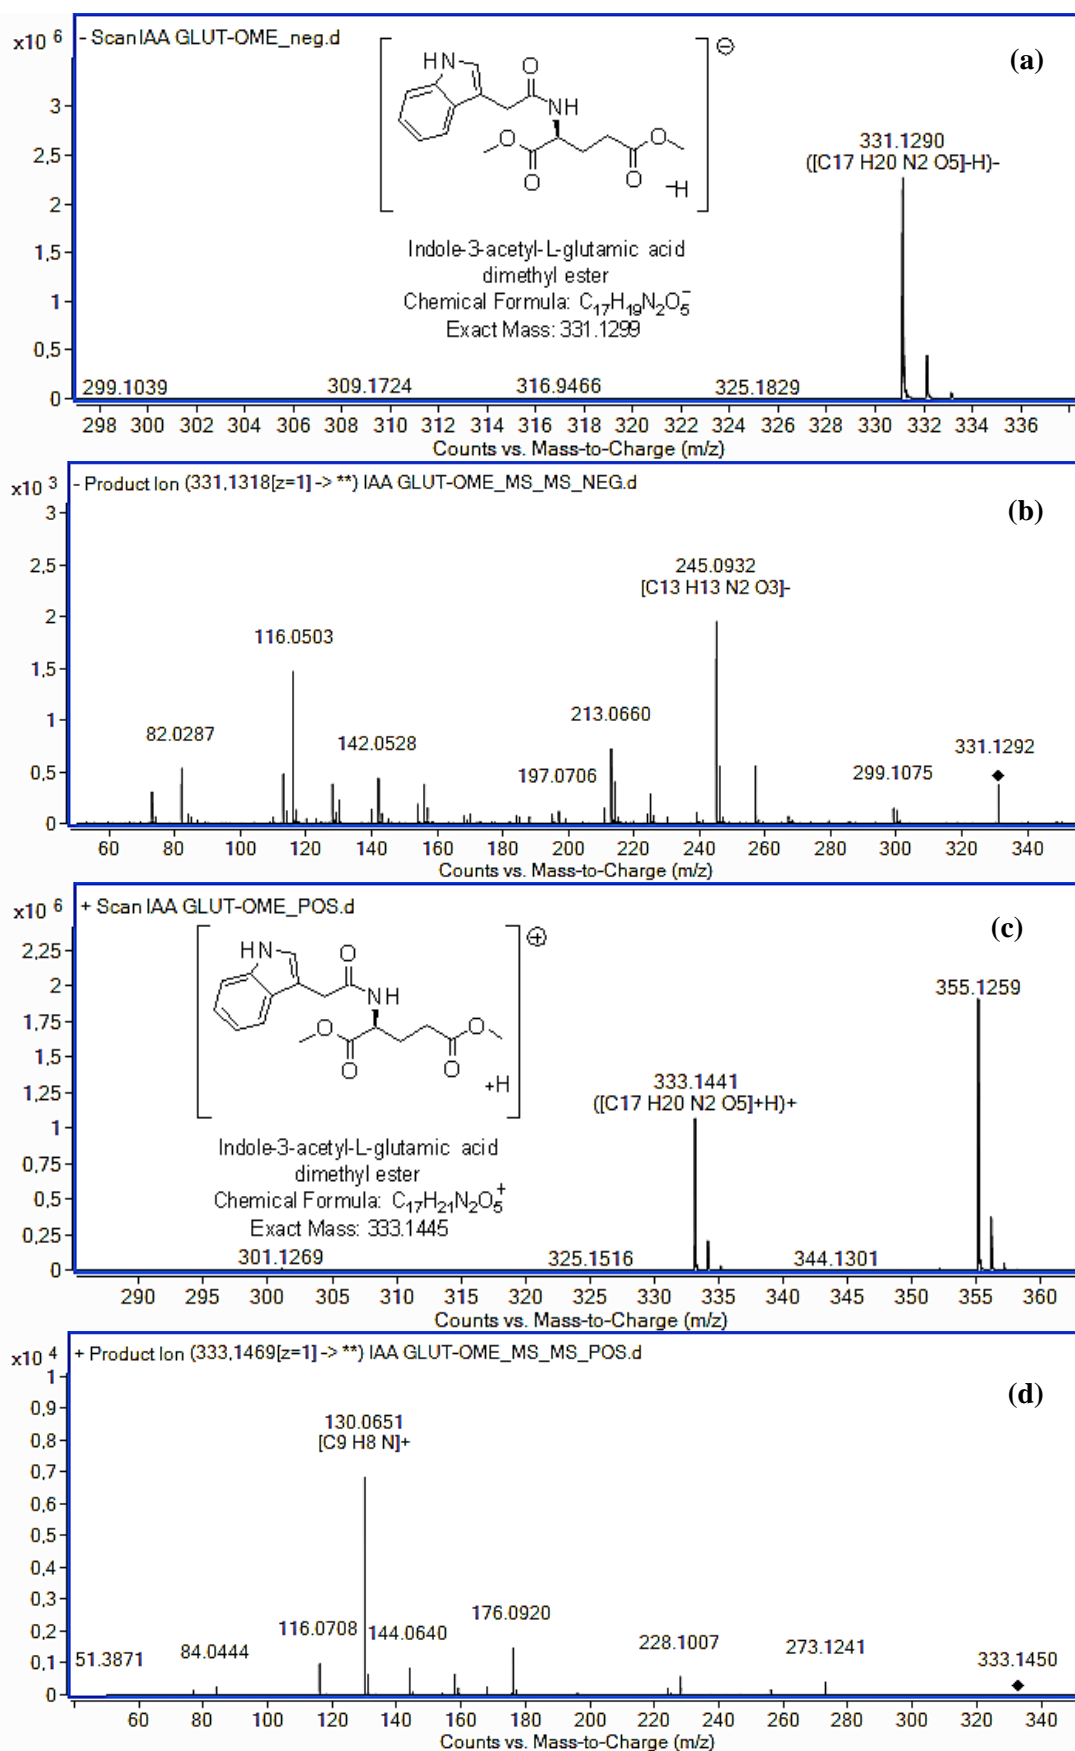

**Fig. S9** Full scan (a) and MS/MS spectra (b) of indole-3-acetyl-L-glutamic acid dimethyl ester under negative ESI mode. Full scan (c) and MS/MS spectra (d) of indole-3-acetyl-L-glutamic acid dimethyl ester under positive ESI mode

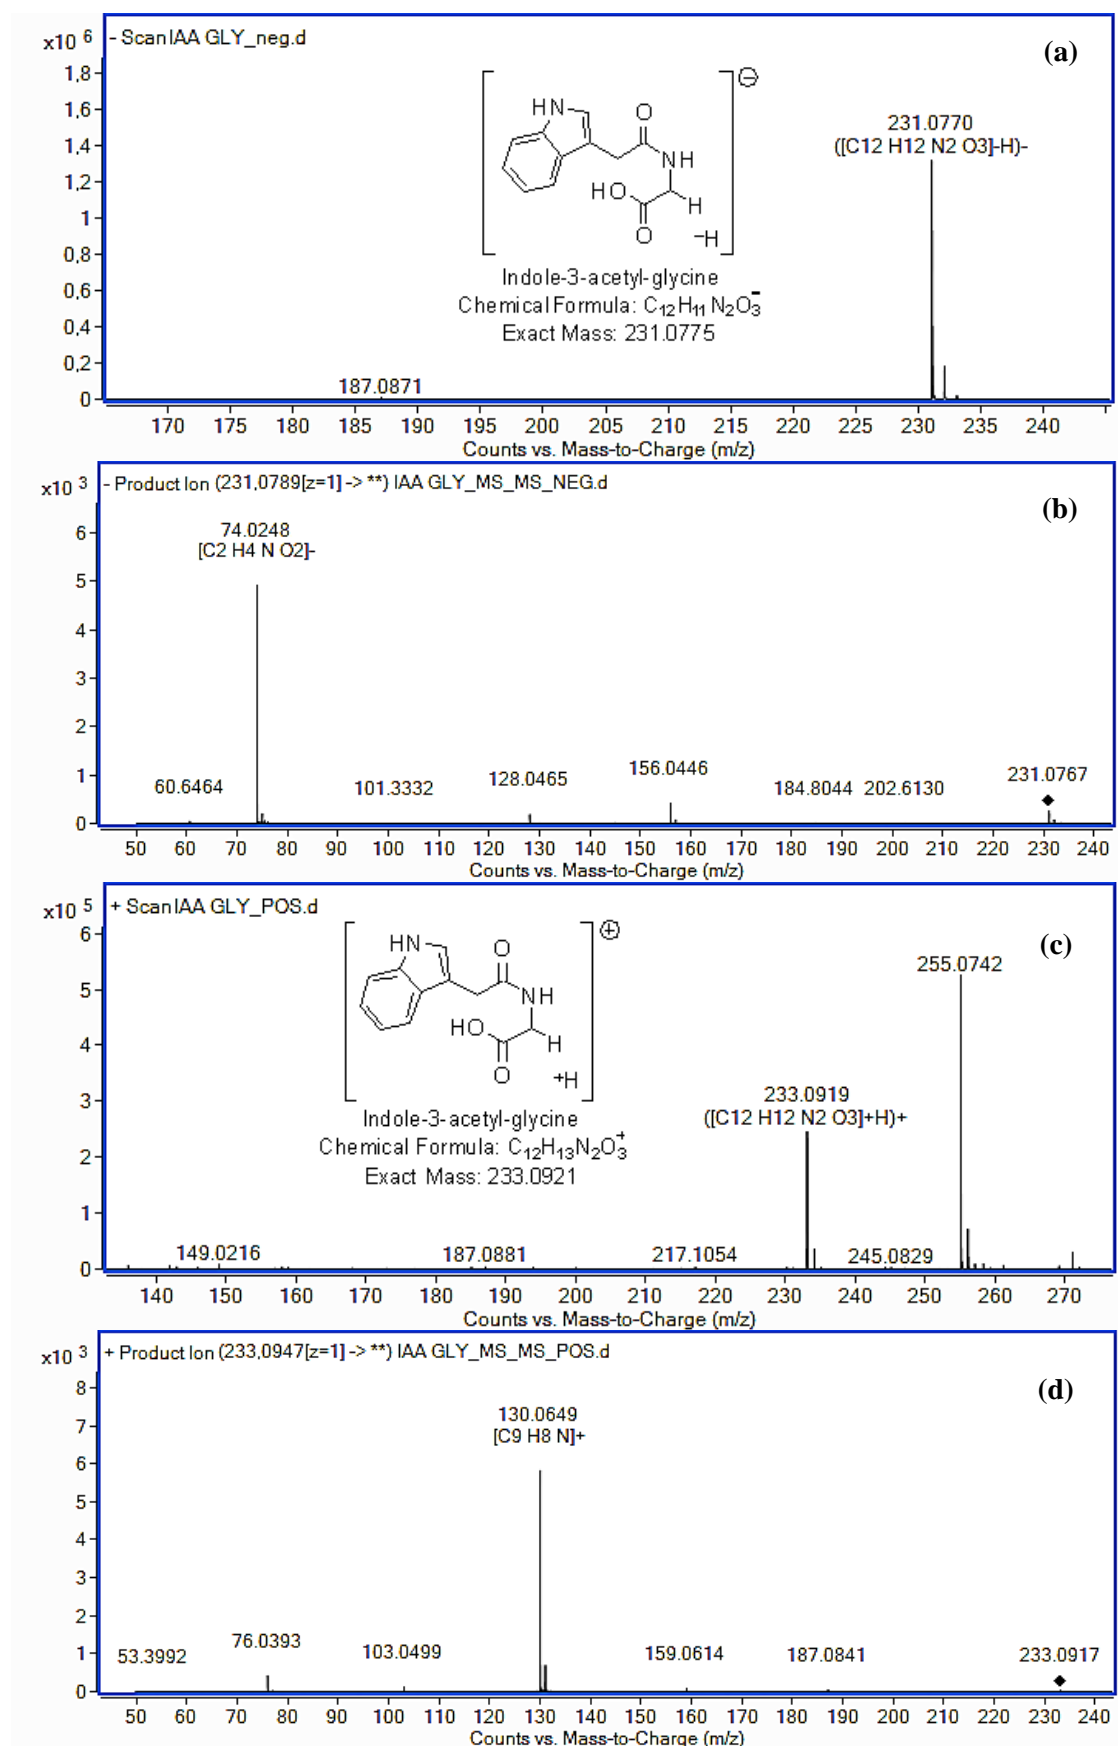

**Fig. S10** Full scan (a) and MS/MS spectra (b) of indole-3-acetyl-glycine under negative ESI mode. Full scan (c) and MS/MS spectra (d) of indole-3-acetyl-glycine under positive ESI mode

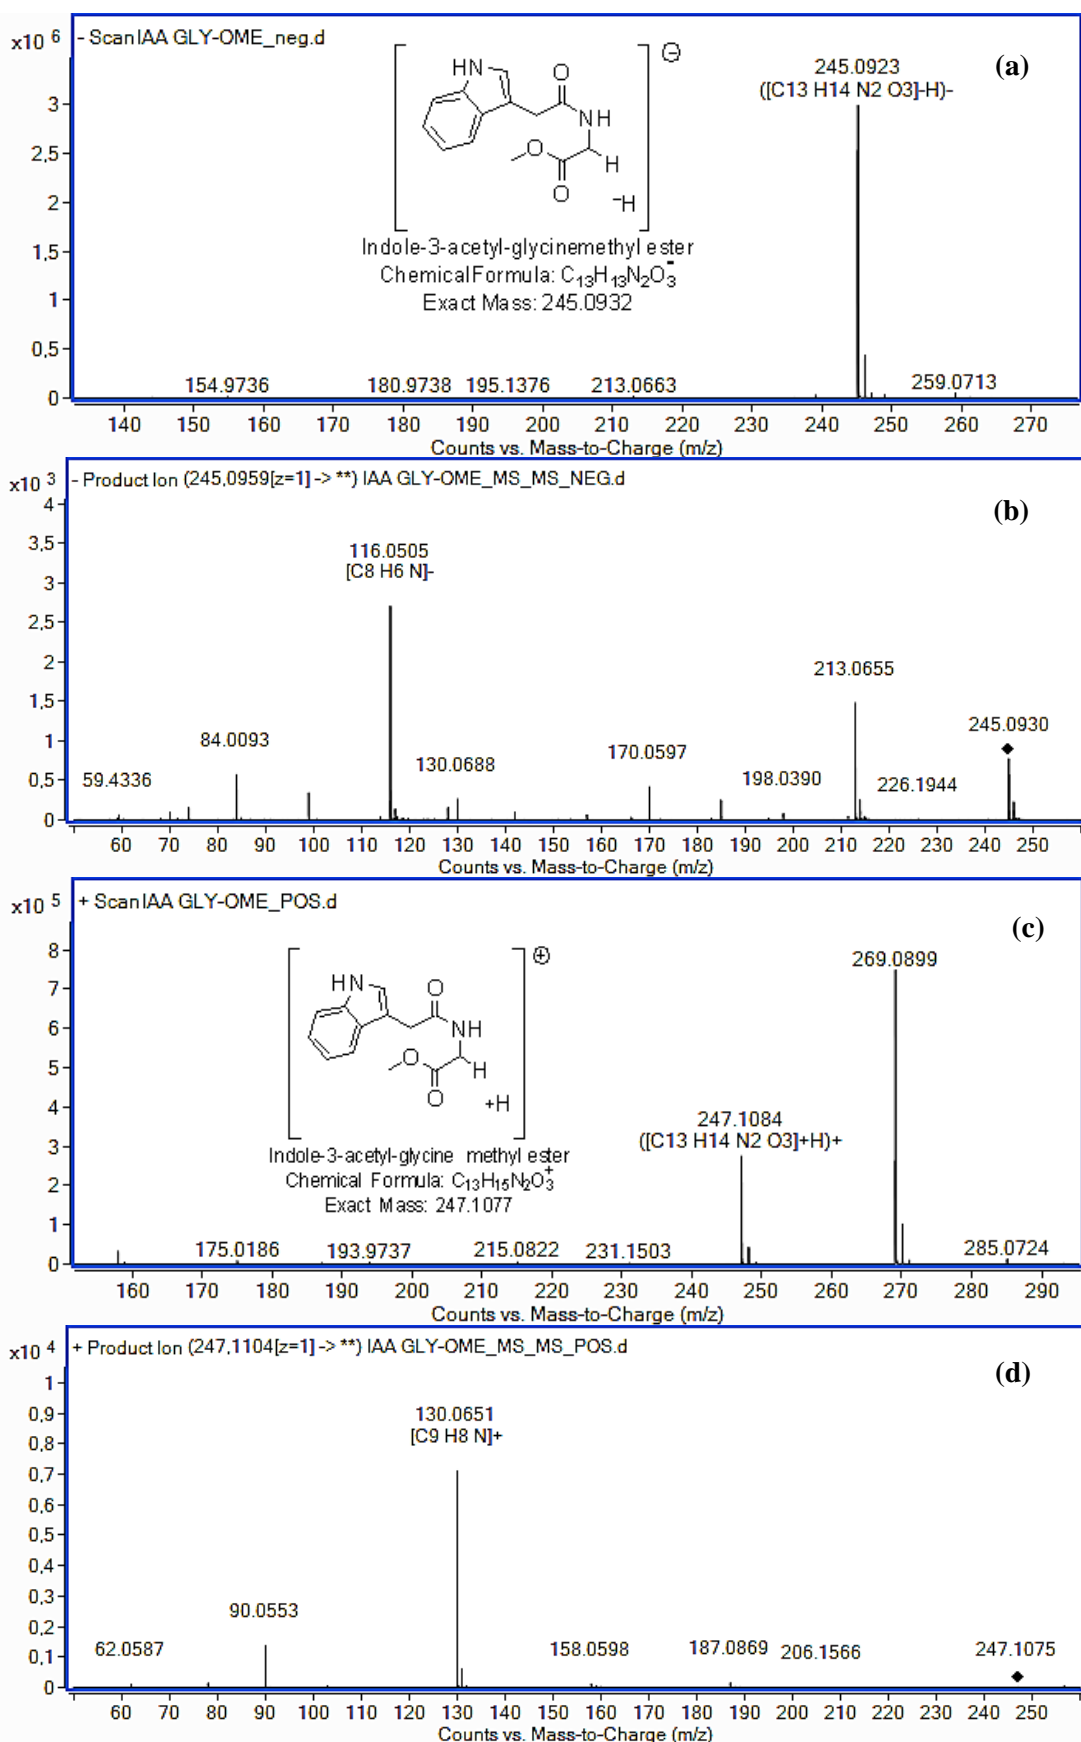

**Fig. S11** Full scan (a) and MS/MS spectra (b) of indole-3-acetyl-glycine methyl ester under negative ESI mode. Full scan (c) and MS/MS spectra (d) of indole-3-acetyl-glycine methyl ester under positive ESI mode

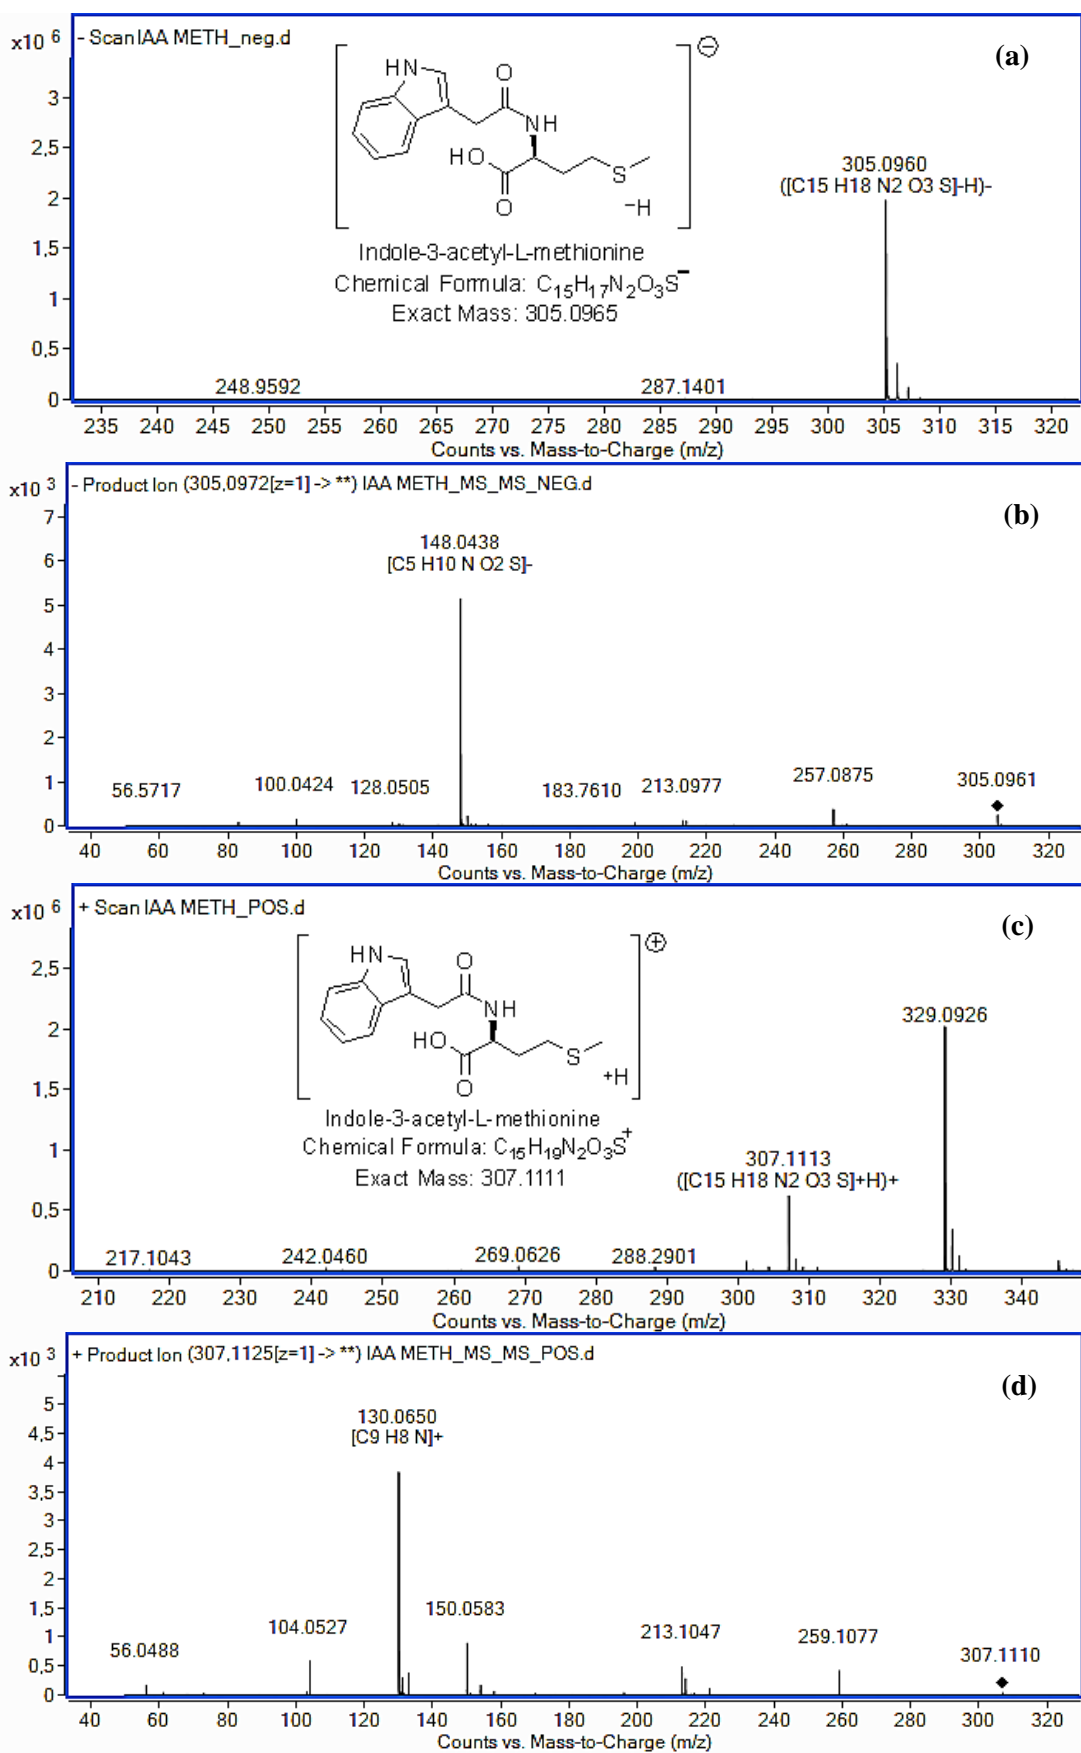

**Fig. S12** Full scan (a) and MS/MS spectra (b) of indole-3-acetyl-L-methionine under negative ESI mode. Full scan (c) and MS/MS spectra (d) of indole-3-acetyl-L-methionine under positive ESI mode

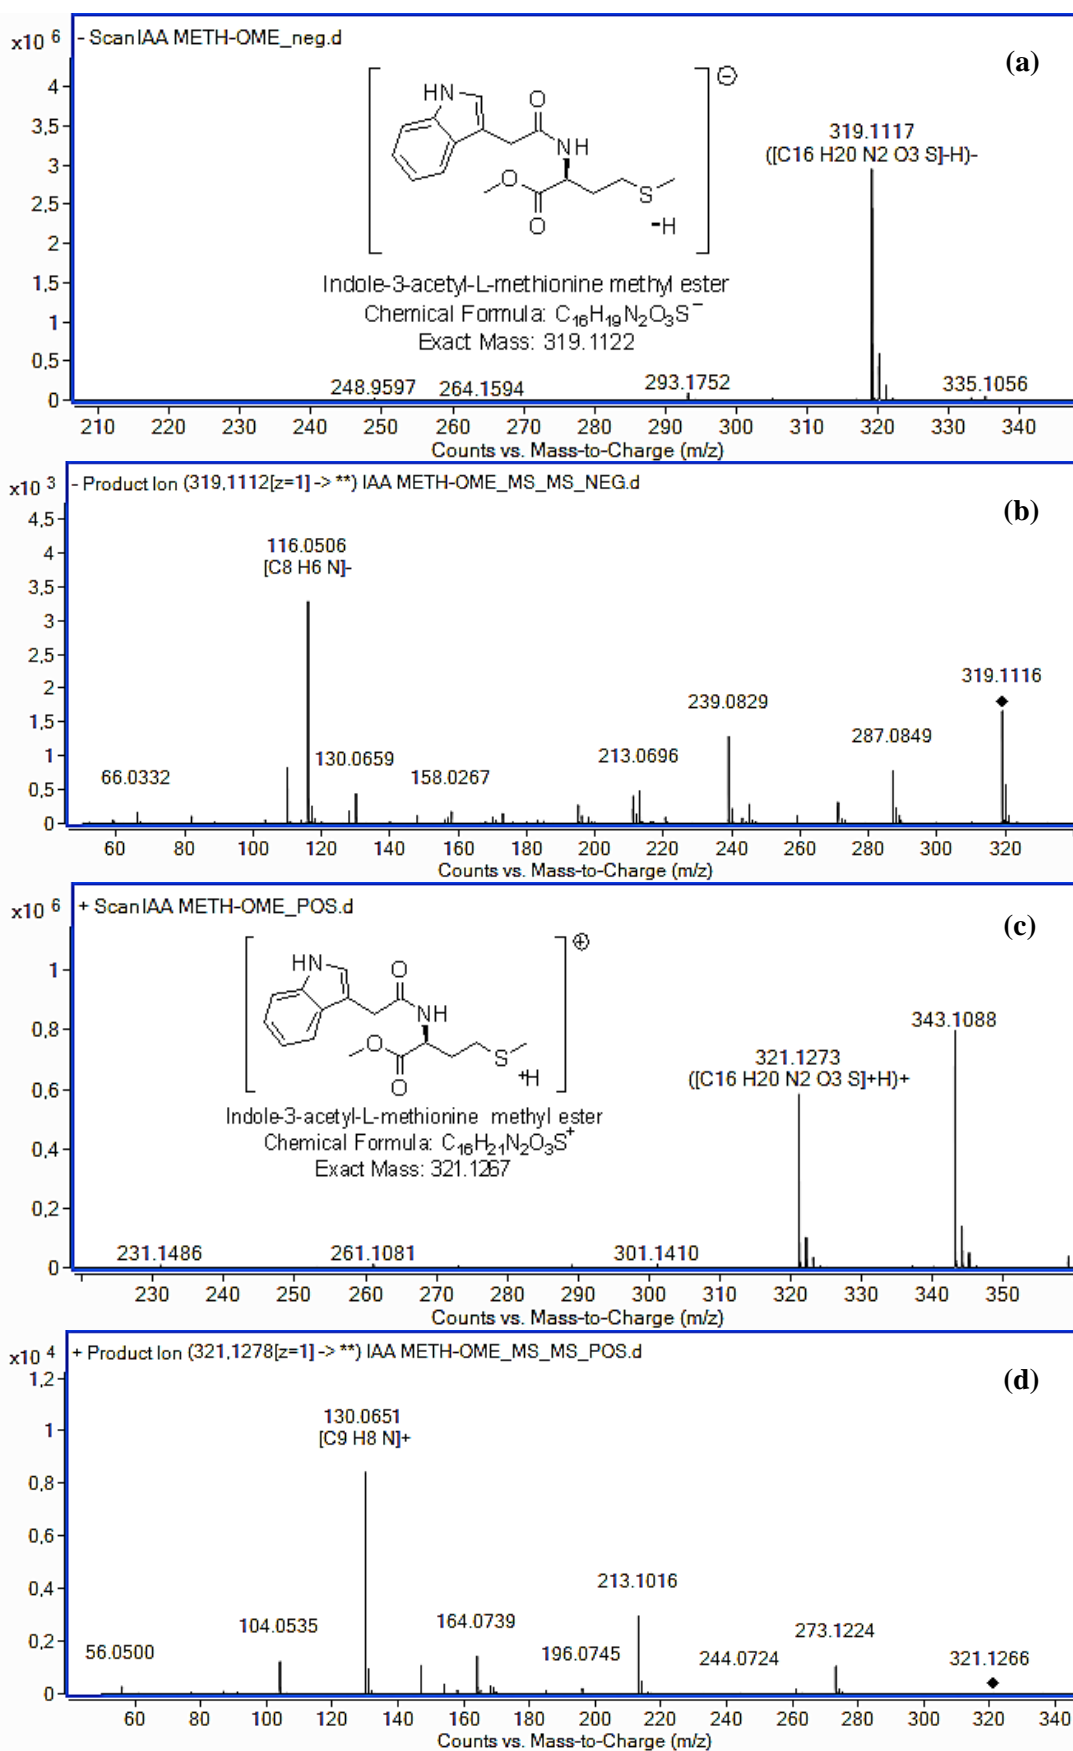

**Fig. S13** Full scan (a) and MS/MS spectra (b) of indole-3-acetyl-L-methionine methyl ester under negative ESI mode. Full scan (c) and MS/MS spectra (d) of indole-3-acetyl-L-methionine methyl ester under positive ESI mode



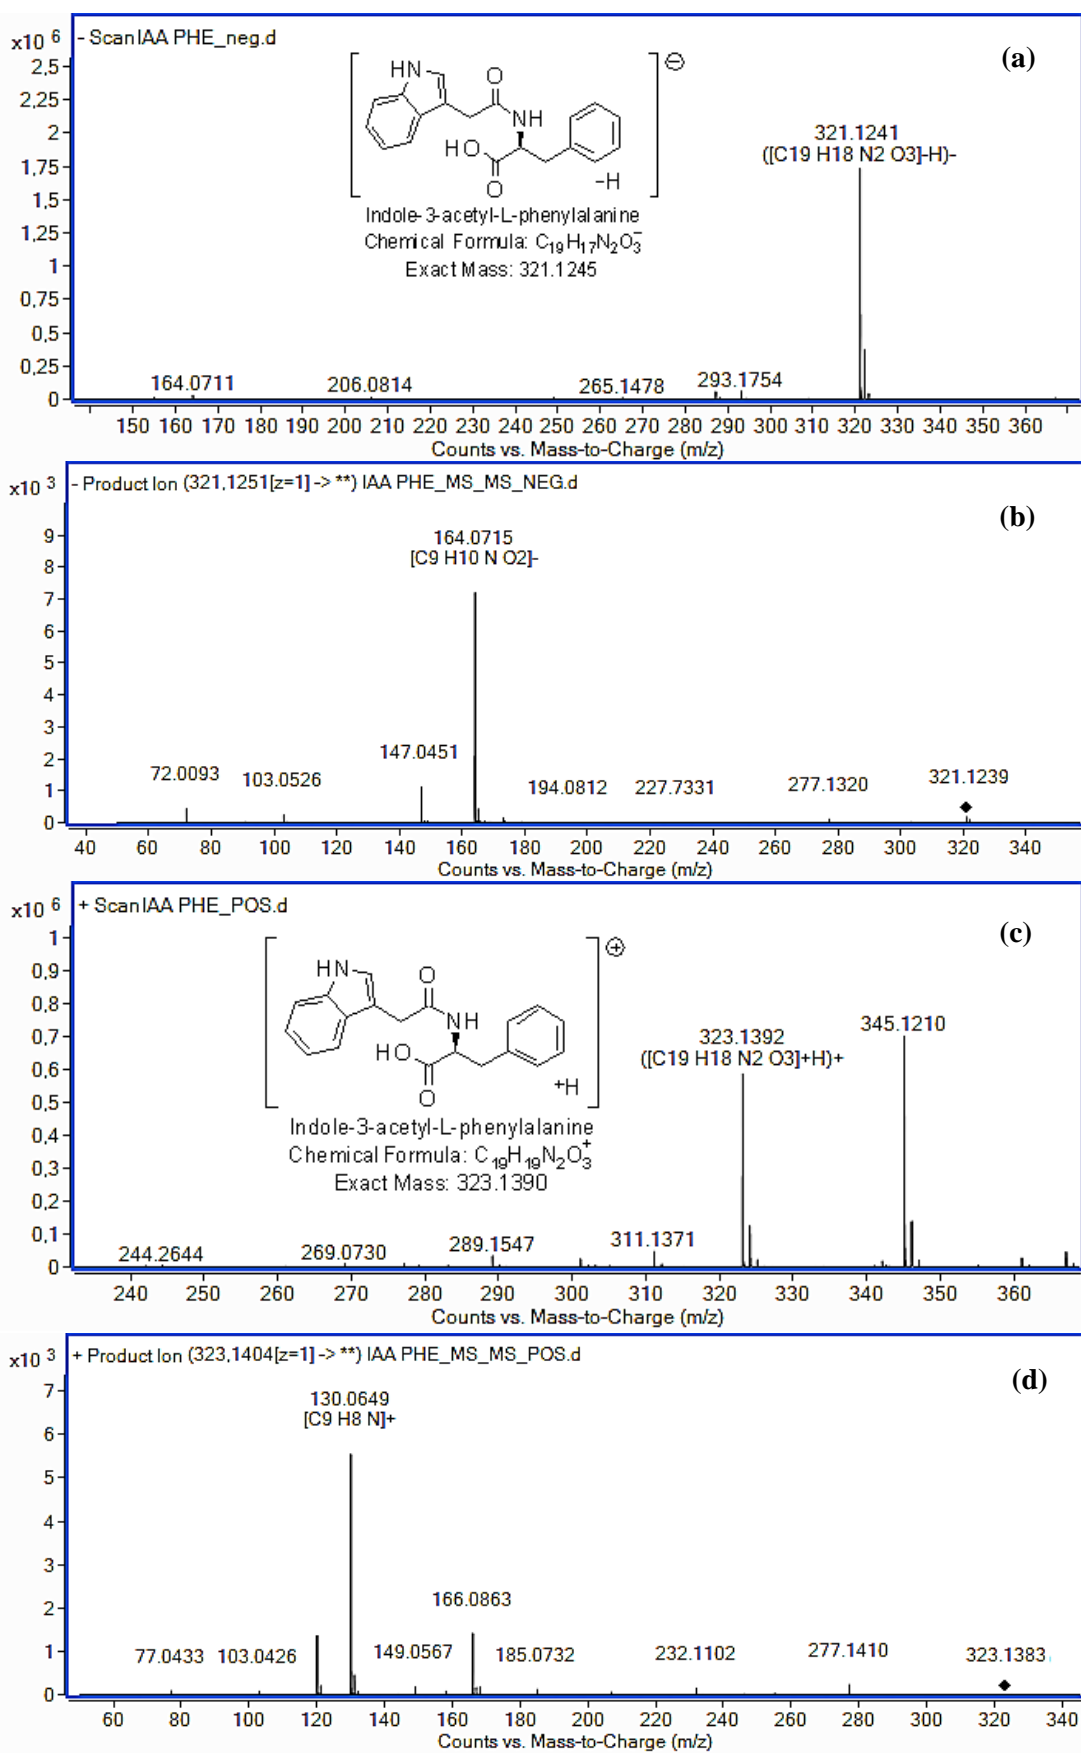

**Fig. S14** Full scan (a) and MS/MS spectra (b) of indole-3-acetyl-L-phenylalanine under negative ESI mode. Full scan (c) and MS/MS spectra (d) of indole-3-acetyl-L-phenylalanine under positive ESI mode

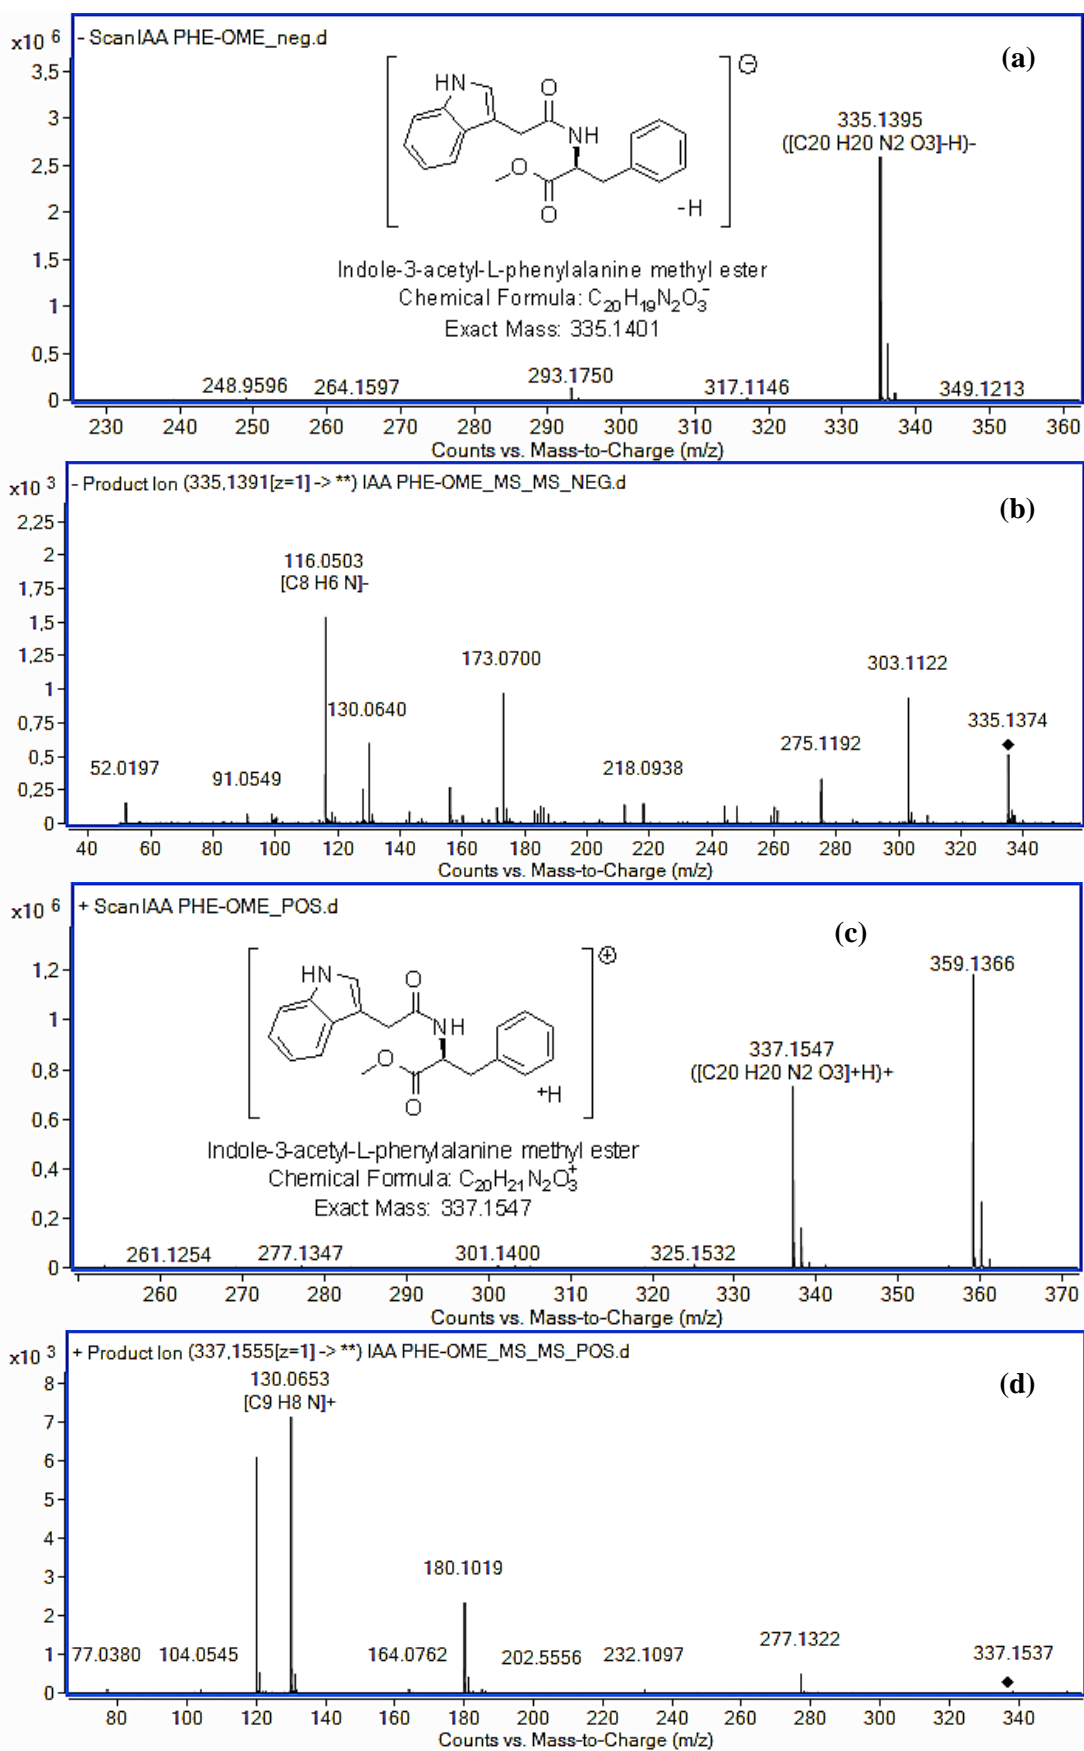

**Fig. S15** Full scan (a) and MS/MS spectra (b) of indole-3-acetyl-L-phenylalanine methyl ester under negative ESI mode. Full scan (c) and MS/MS spectra (d) of indole-3-acetyl-L-phenylalanine methyl ester under positive ESI mode

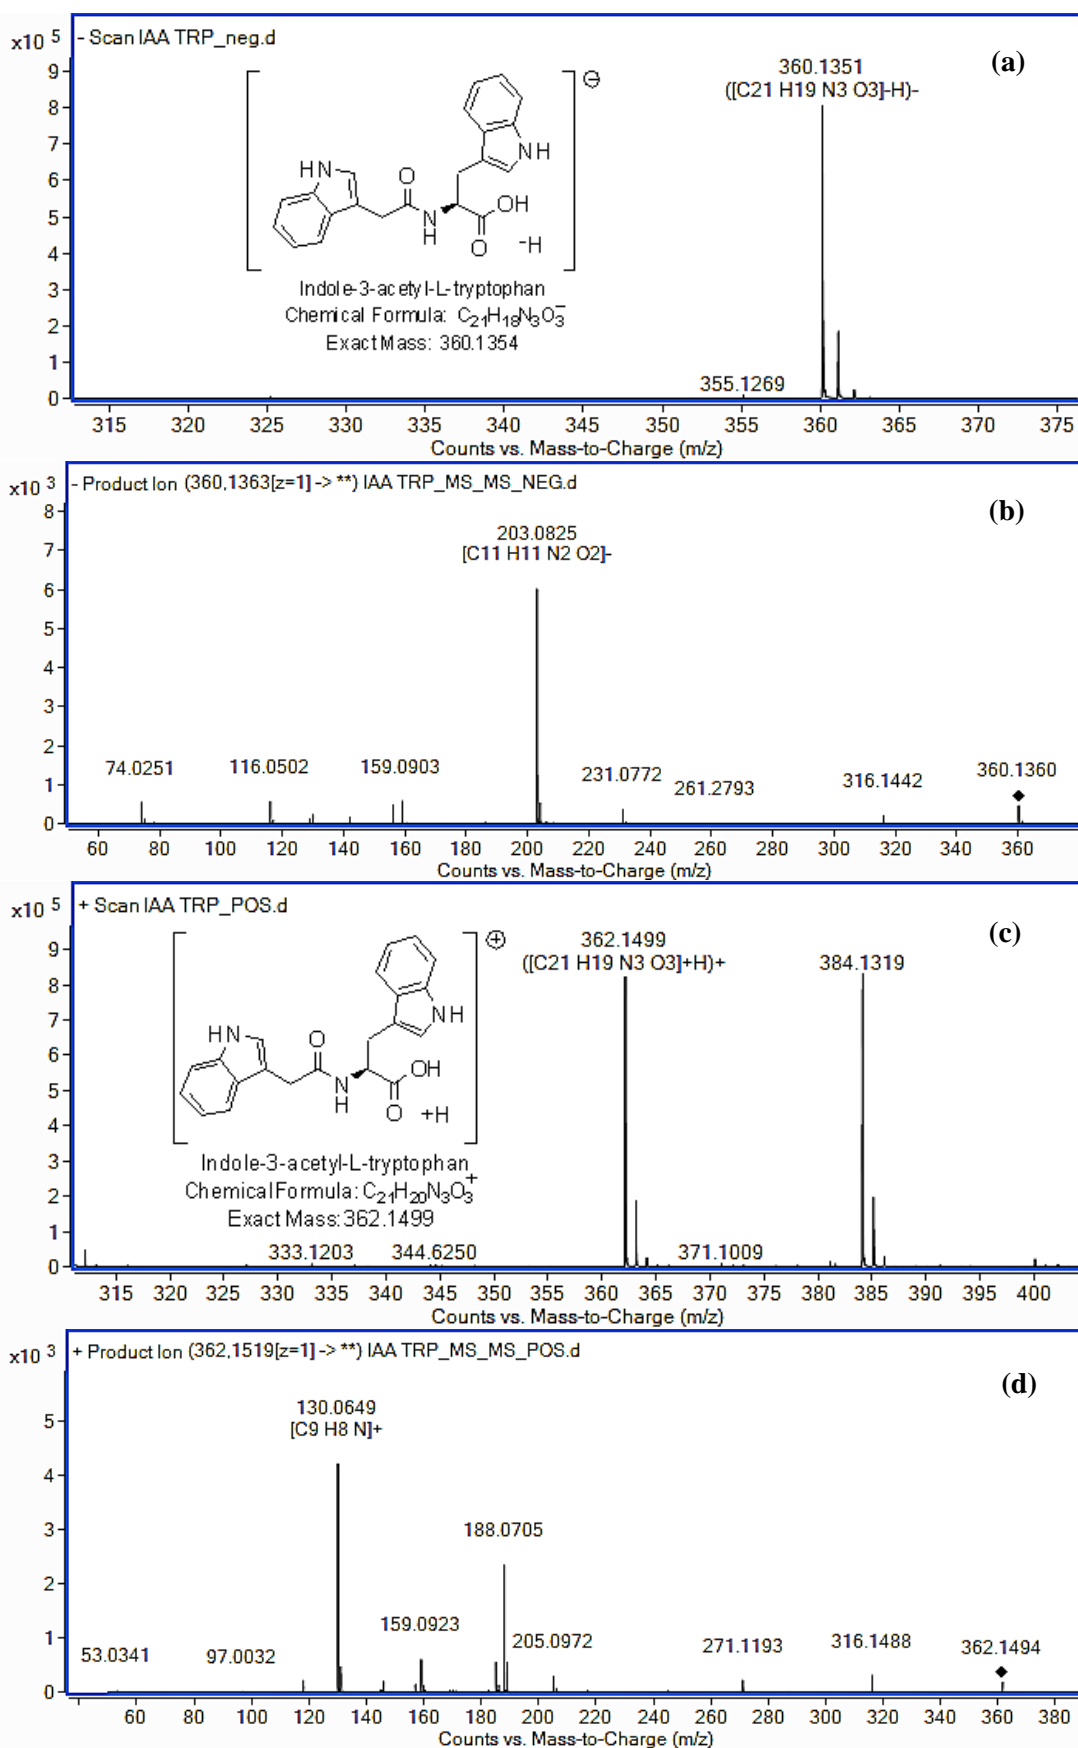

**Fig. S16** Full scan (a) and MS/MS spectra (b) of indole-3-acetyl-L-tryptophan under negative ESI mode. Full scan (c) and MS/MS spectra (d) of indole-3-acetyl-L-tryptophan under positive ESI mode

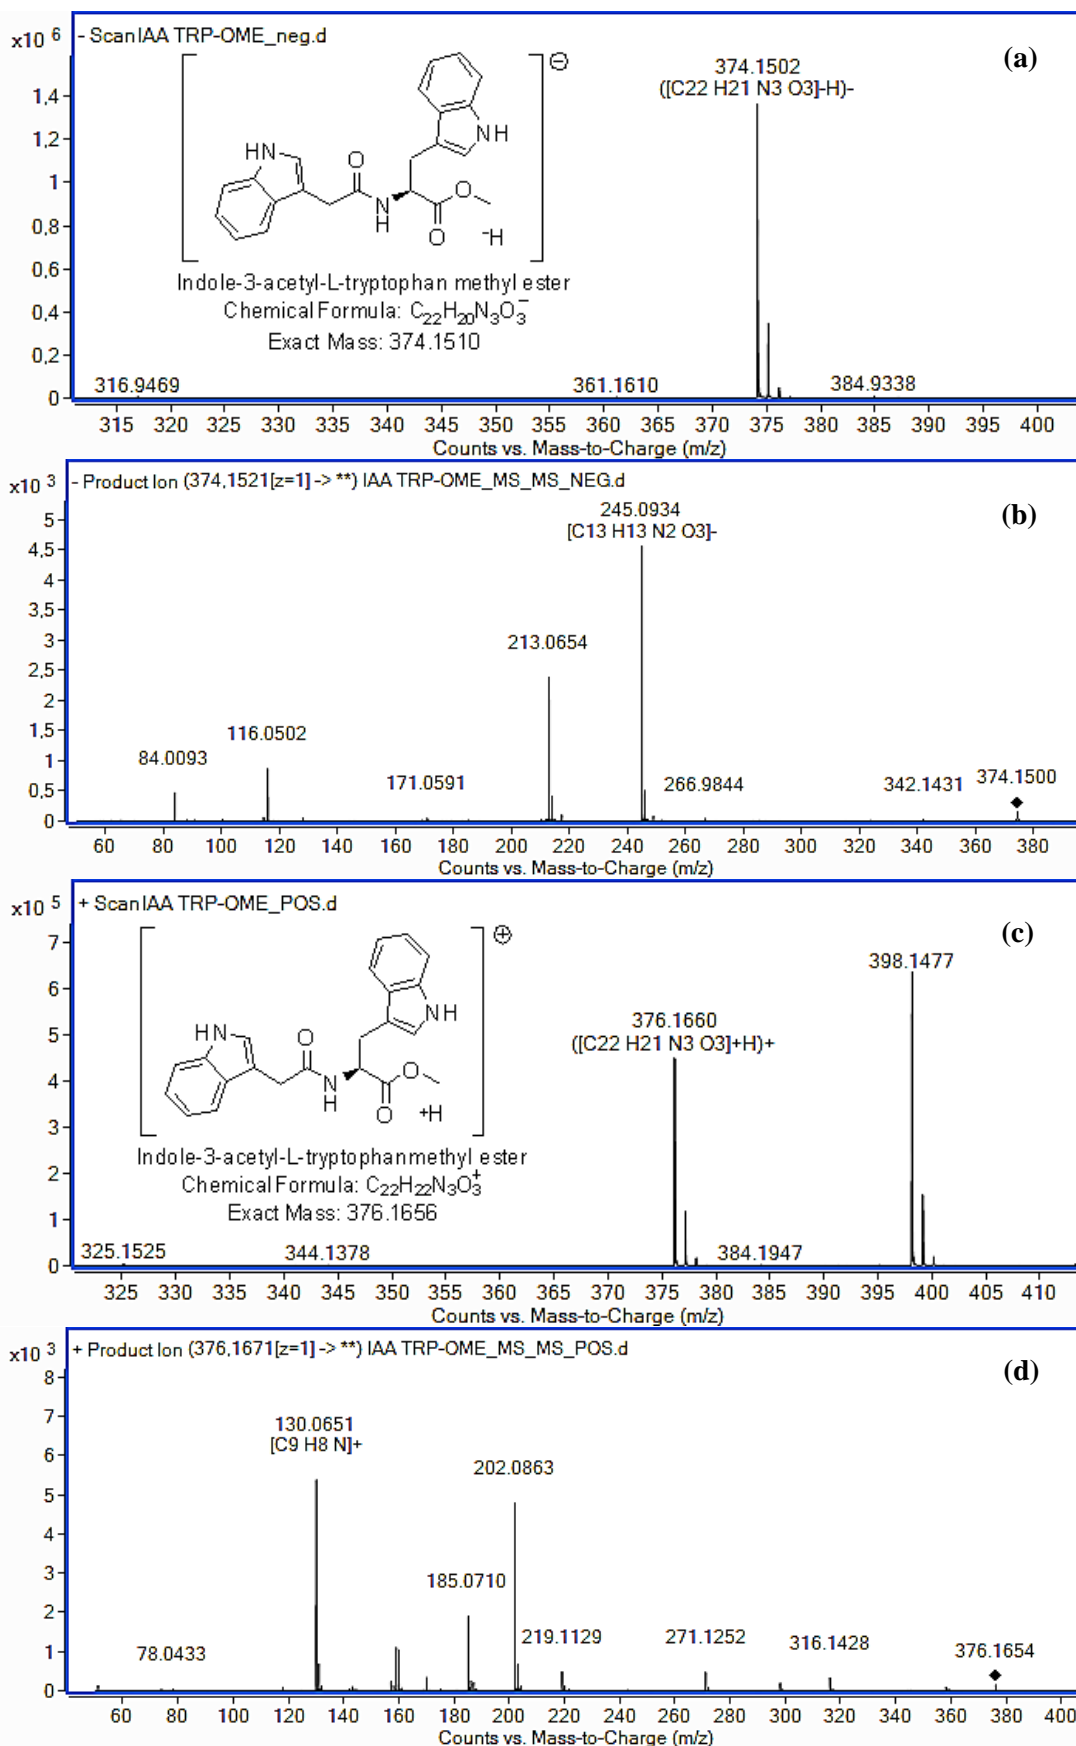

**Fig. S17** Full scan (a) and MS/MS spectra (b) of indole-3-acetyl-L-tryptophan methyl ester under negative ESI mode. Full scan (c) and MS/MS spectra (d) of indole-3-acetyl-L-tryptophan methyl ester under positive ESI mode

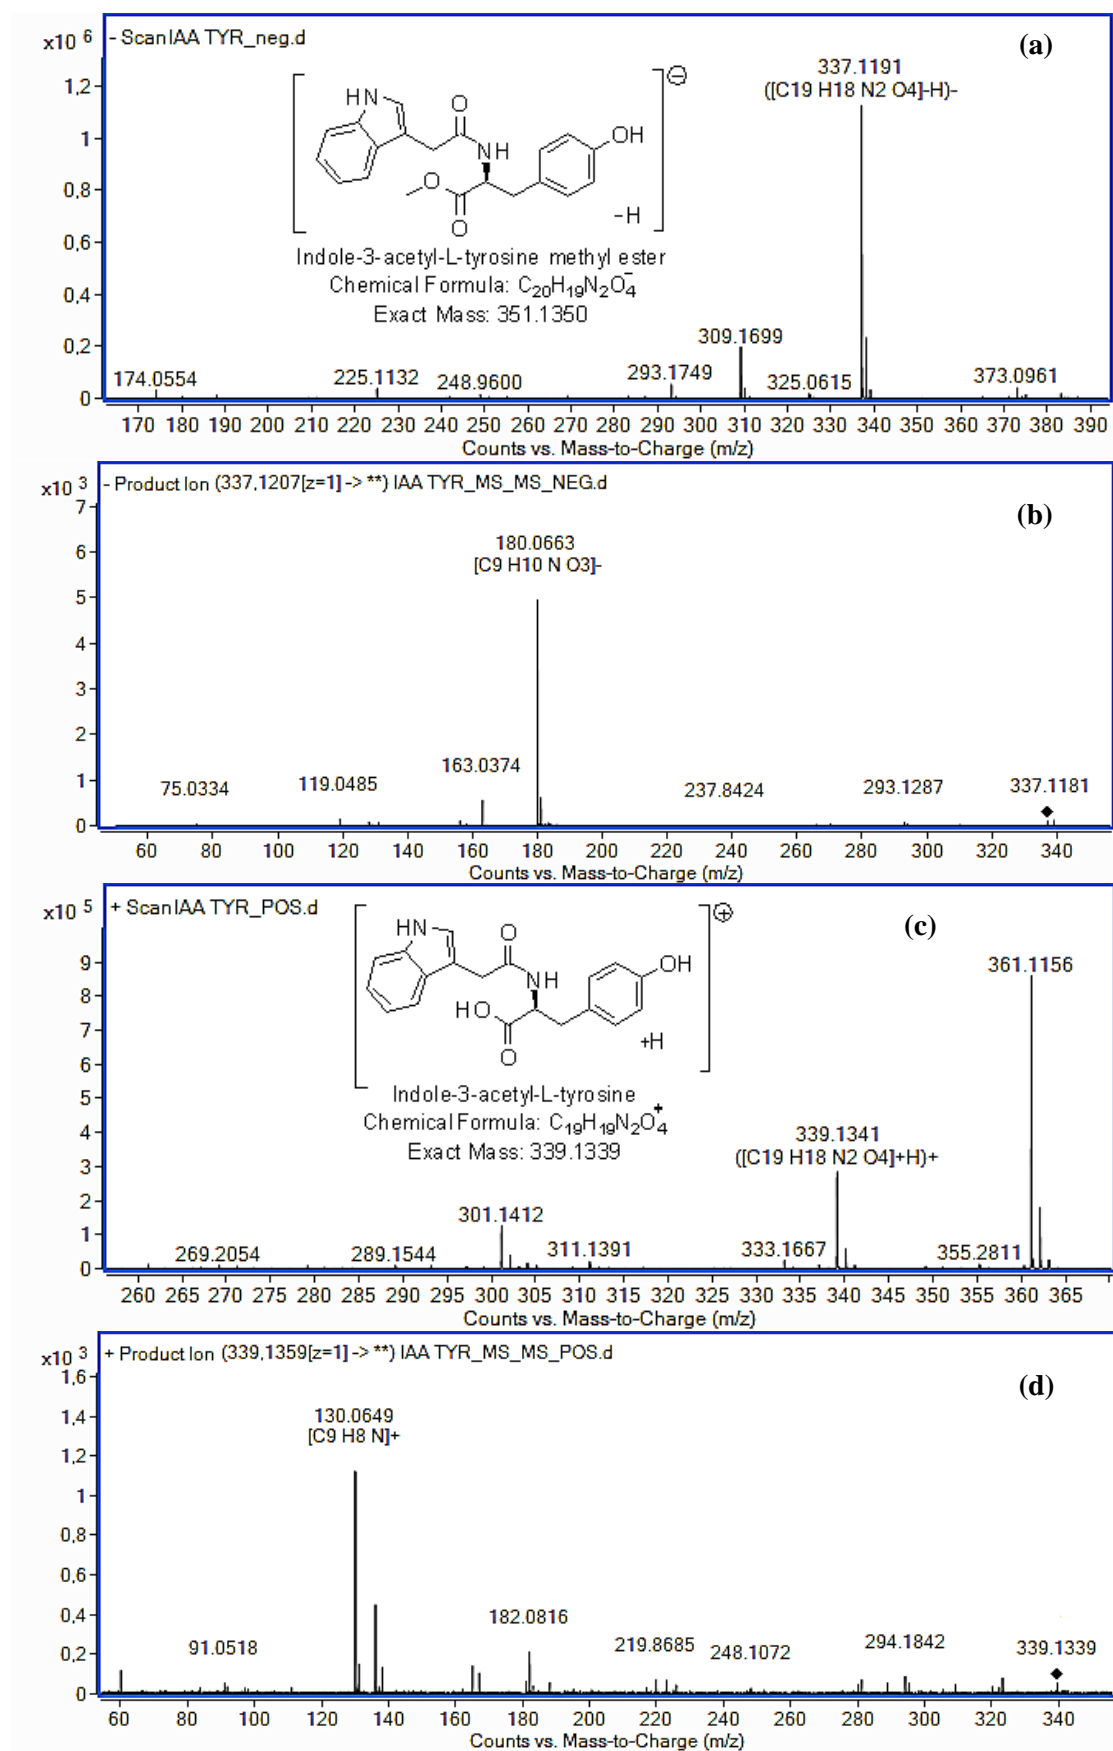

**Fig. S18** Full scan (a) and MS/MS spectra (b) of indole-3-acetyl-L-tyrosine under negative ESI mode. Full scan (c) and MS/MS spectra (d) of indole-3-acetyl-L-tyrosine under positive ESI mode

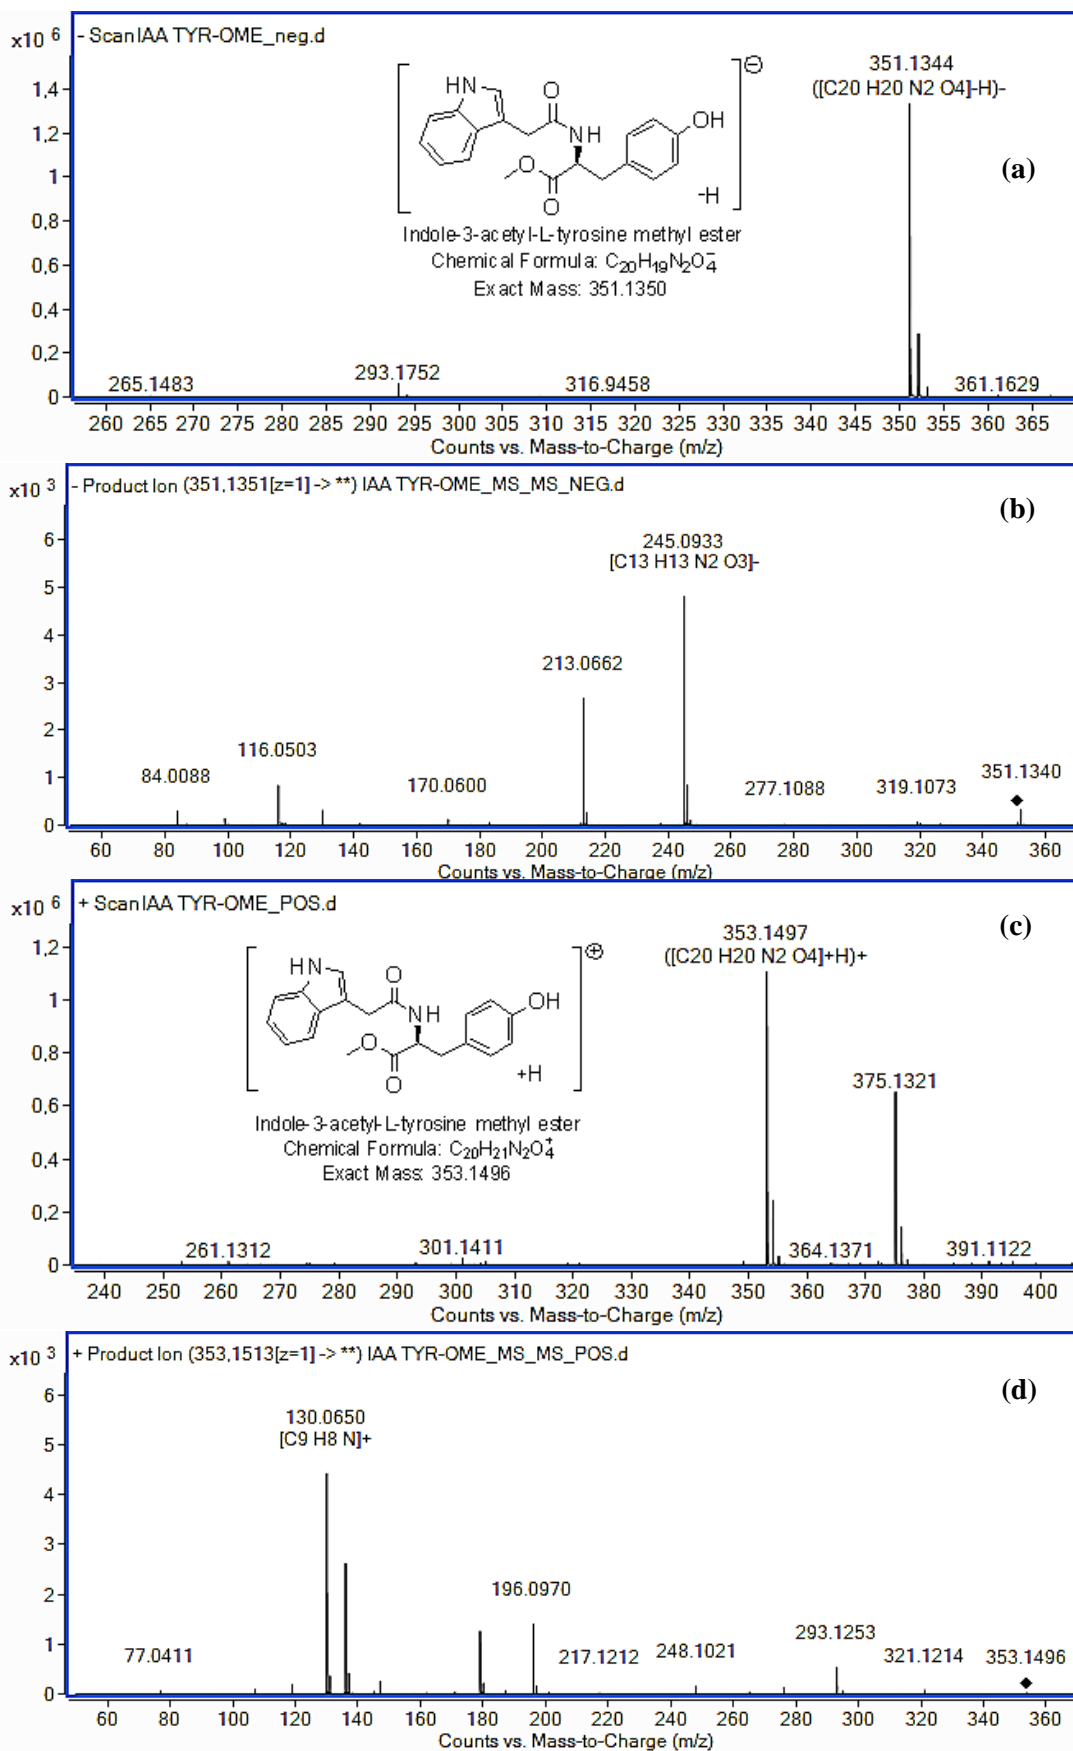

**Fig. S19** Full scan (a) and MS/MS spectra (b) of indole-3-acetyl-L-tyrosine methyl ester under negative ESI mode. Full scan (c) and MS/MS spectra (d) of indole-3-acetyl-L-tyrosine methyl ester under positive ESI mode

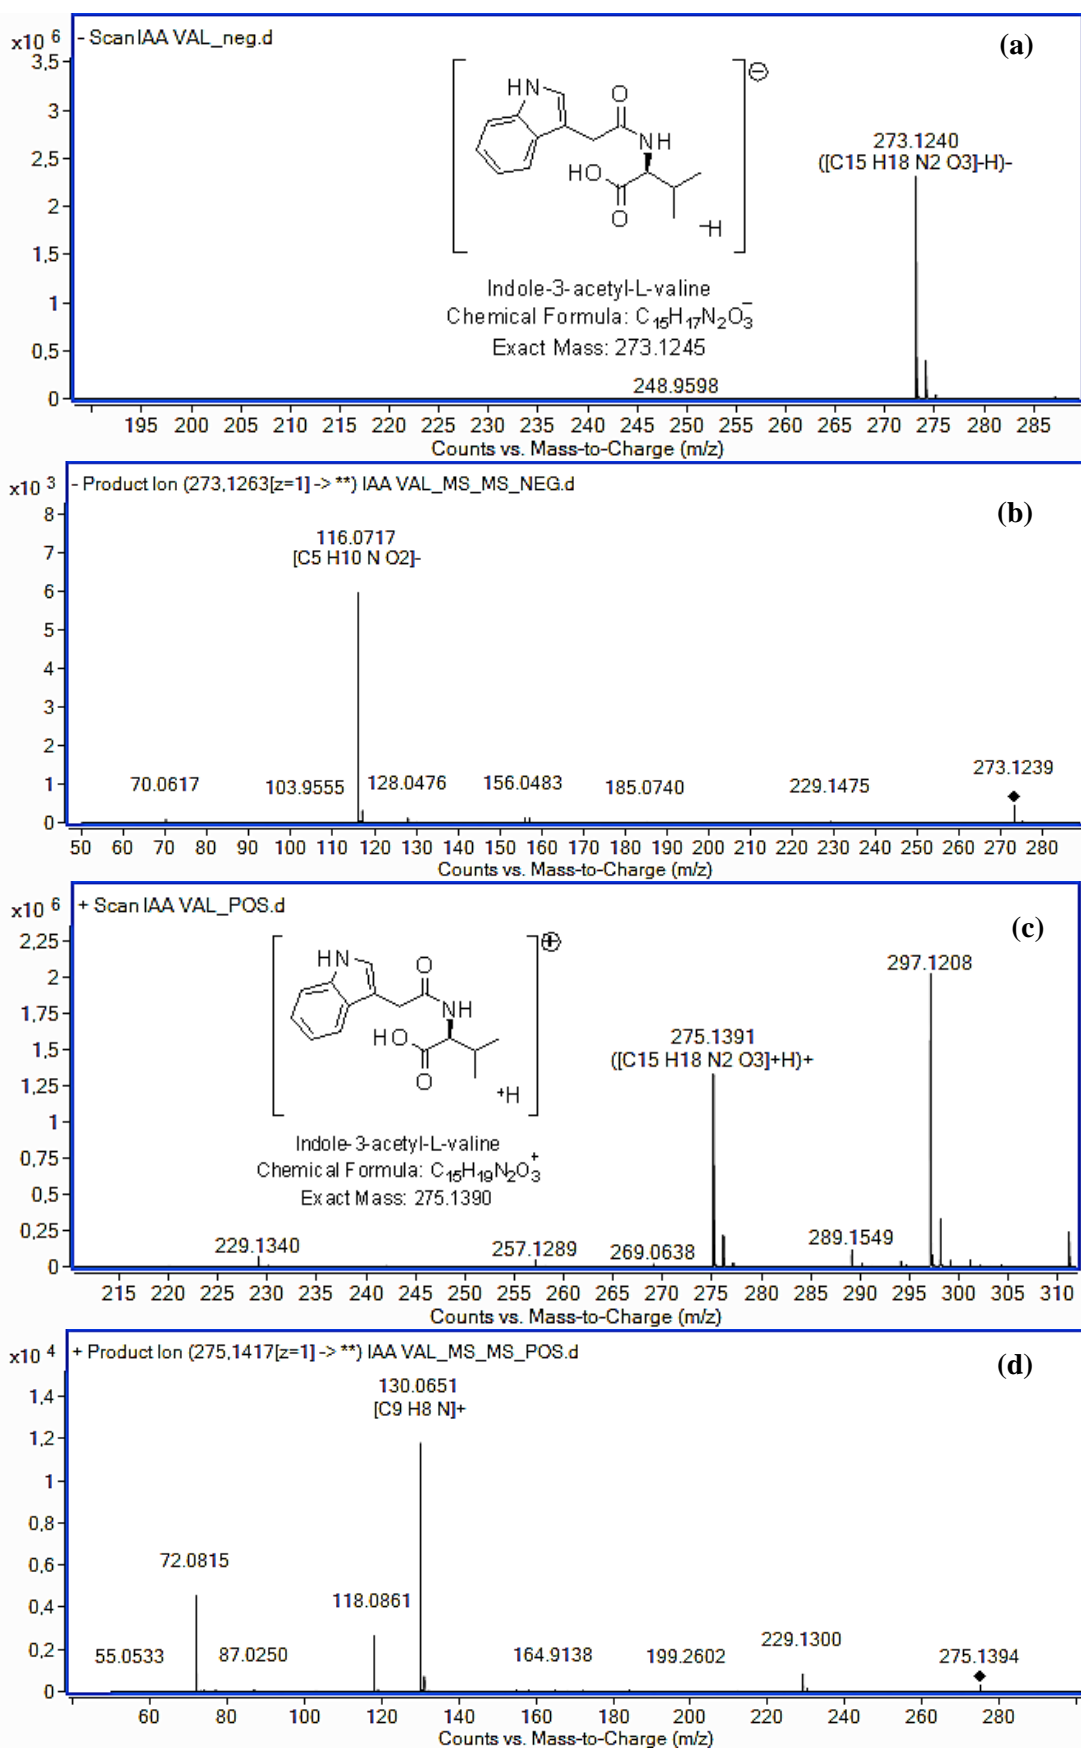

**Fig. S20** Full scan (a) and MS/MS spectra (b) of indole-3-acetyl-L-valine under negative ESI mode. Full scan (c) and MS/MS spectra (d) of indole-3-acetyl-L-valine under positive ESI mode

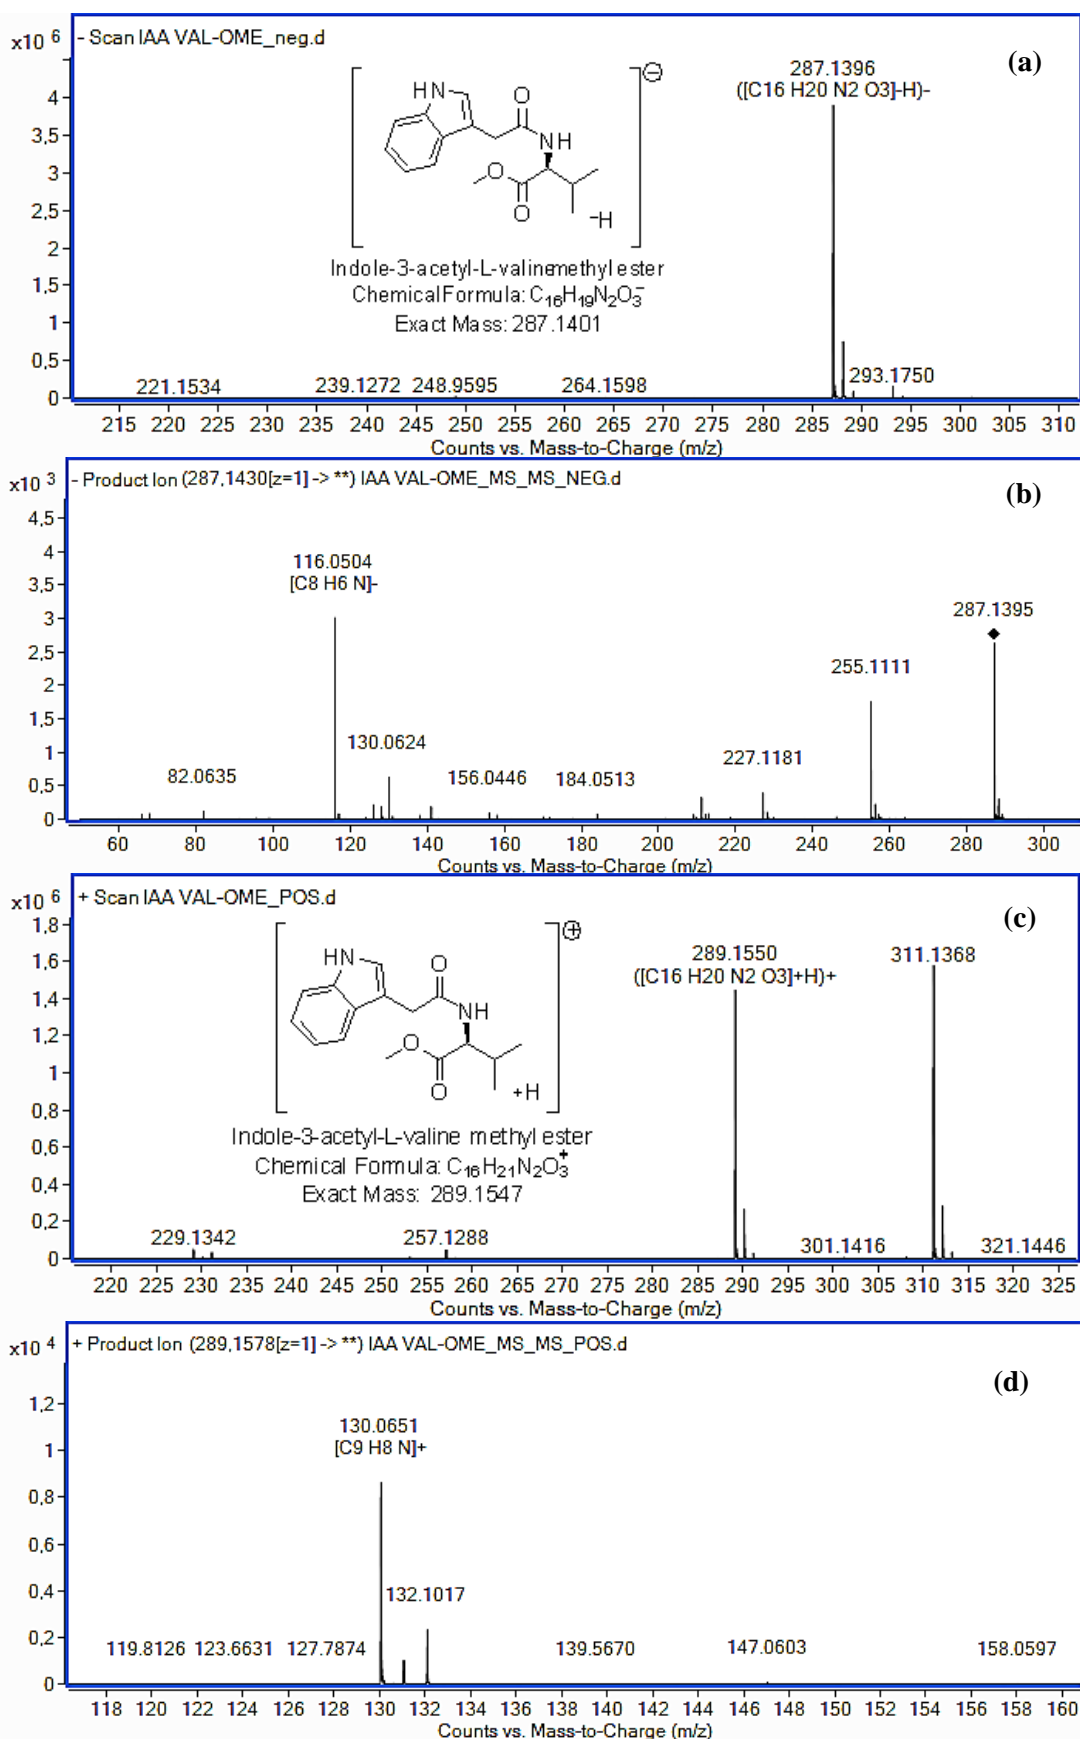

**Fig. S21** Full scan (a) and MS/MS spectra (b) of indole-3-acetyl-L-valine methyl ester under negative ESI mode. Full scan (c) and MS/MS spectra (d) of indole-3-acetyl-L-valine methyl ester under positive ESI mode



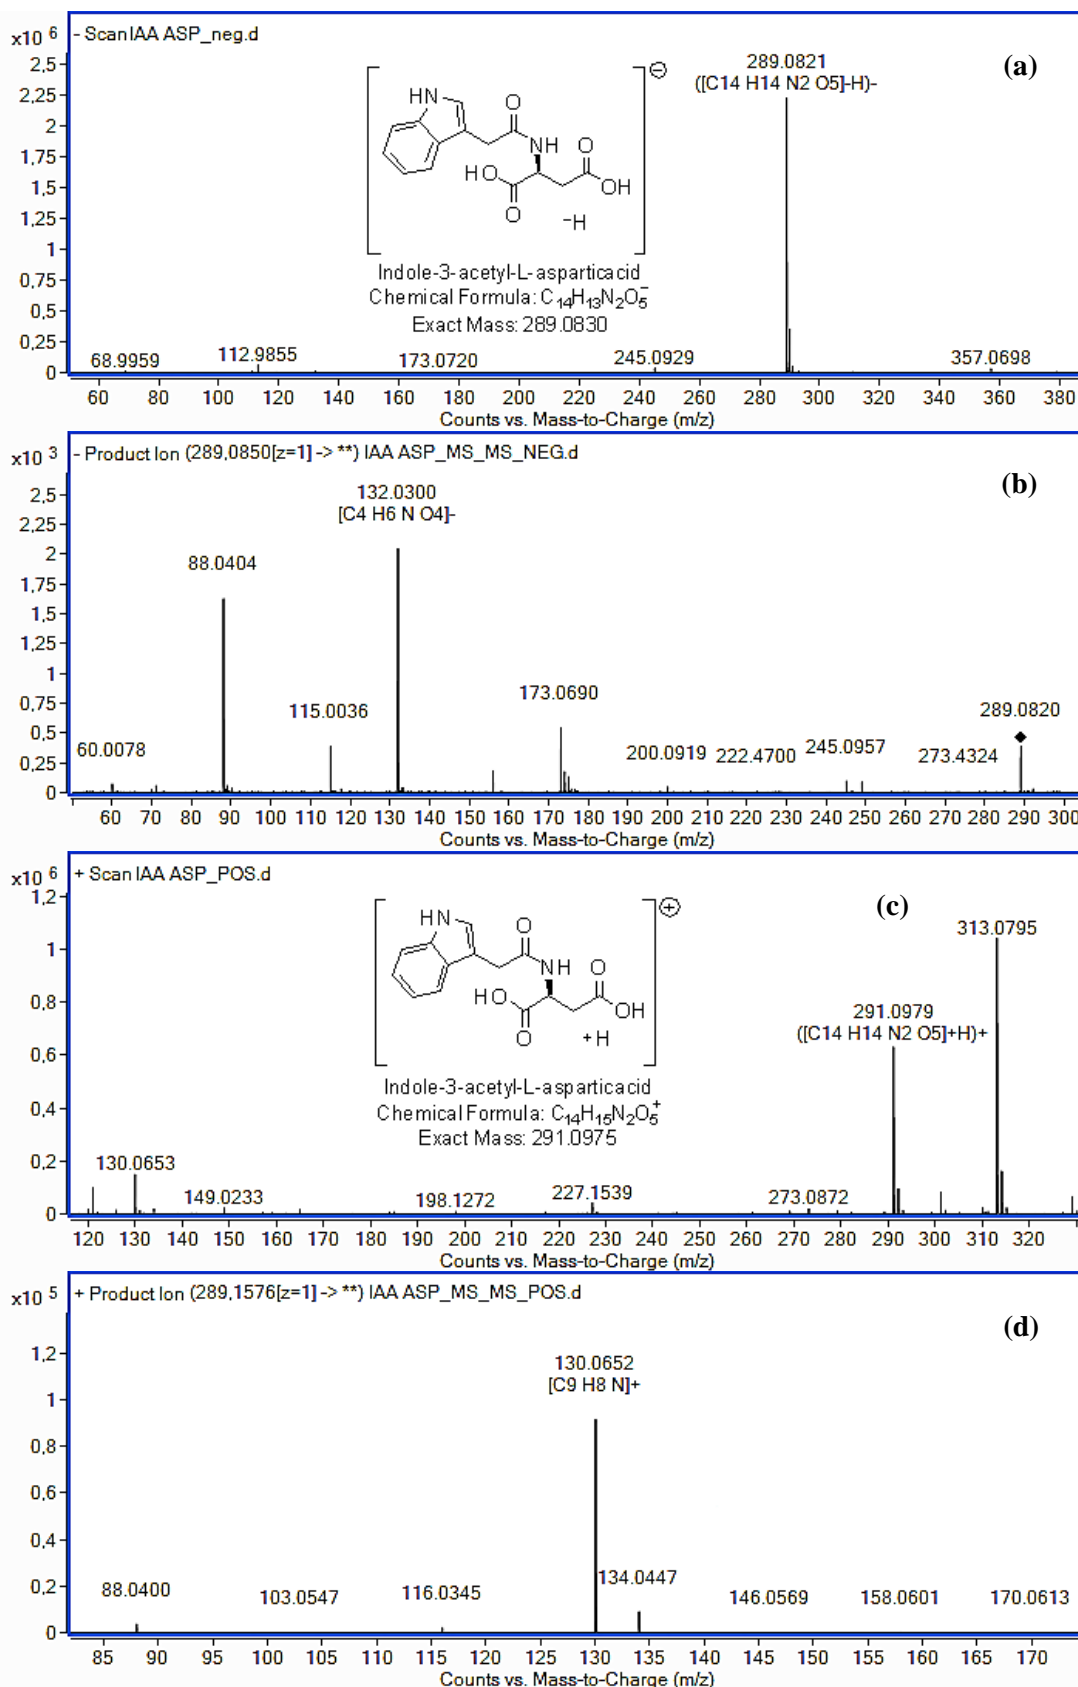

**Fig. S22** Full scan (a) and MS/MS spectra (b) of indole-3-acetyl-L-aspartic acid under negative ESI mode. Full scan (c) and MS/MS spectra (d) of indole-3-acetyl-L-aspartic acid under positive ESI mode

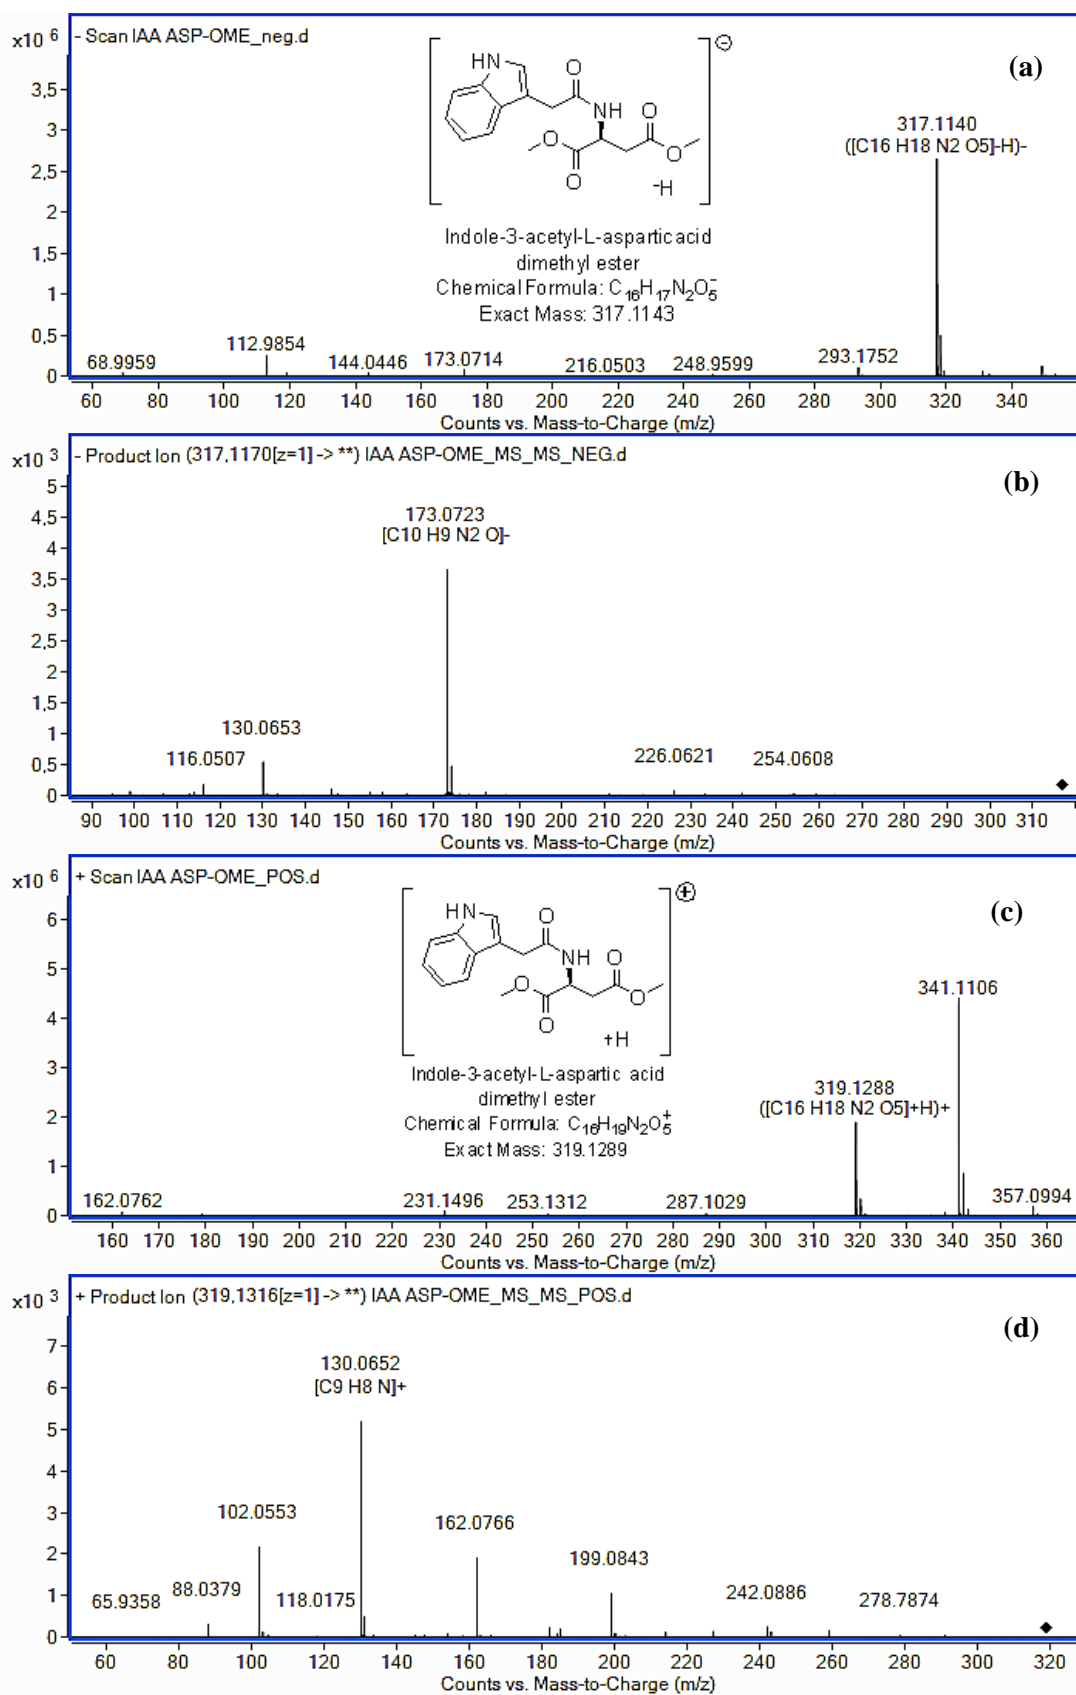

**Fig. S23** Full scan (a) and MS/MS spectra (b) of indole-3-acetyl-L-aspartic acid dimethyl ester under negative ESI mode. Full scan (c) and MS/MS spectra (d) of indole-3-acetyl-L-aspartic acid dimethyl ester under positive ESI mode

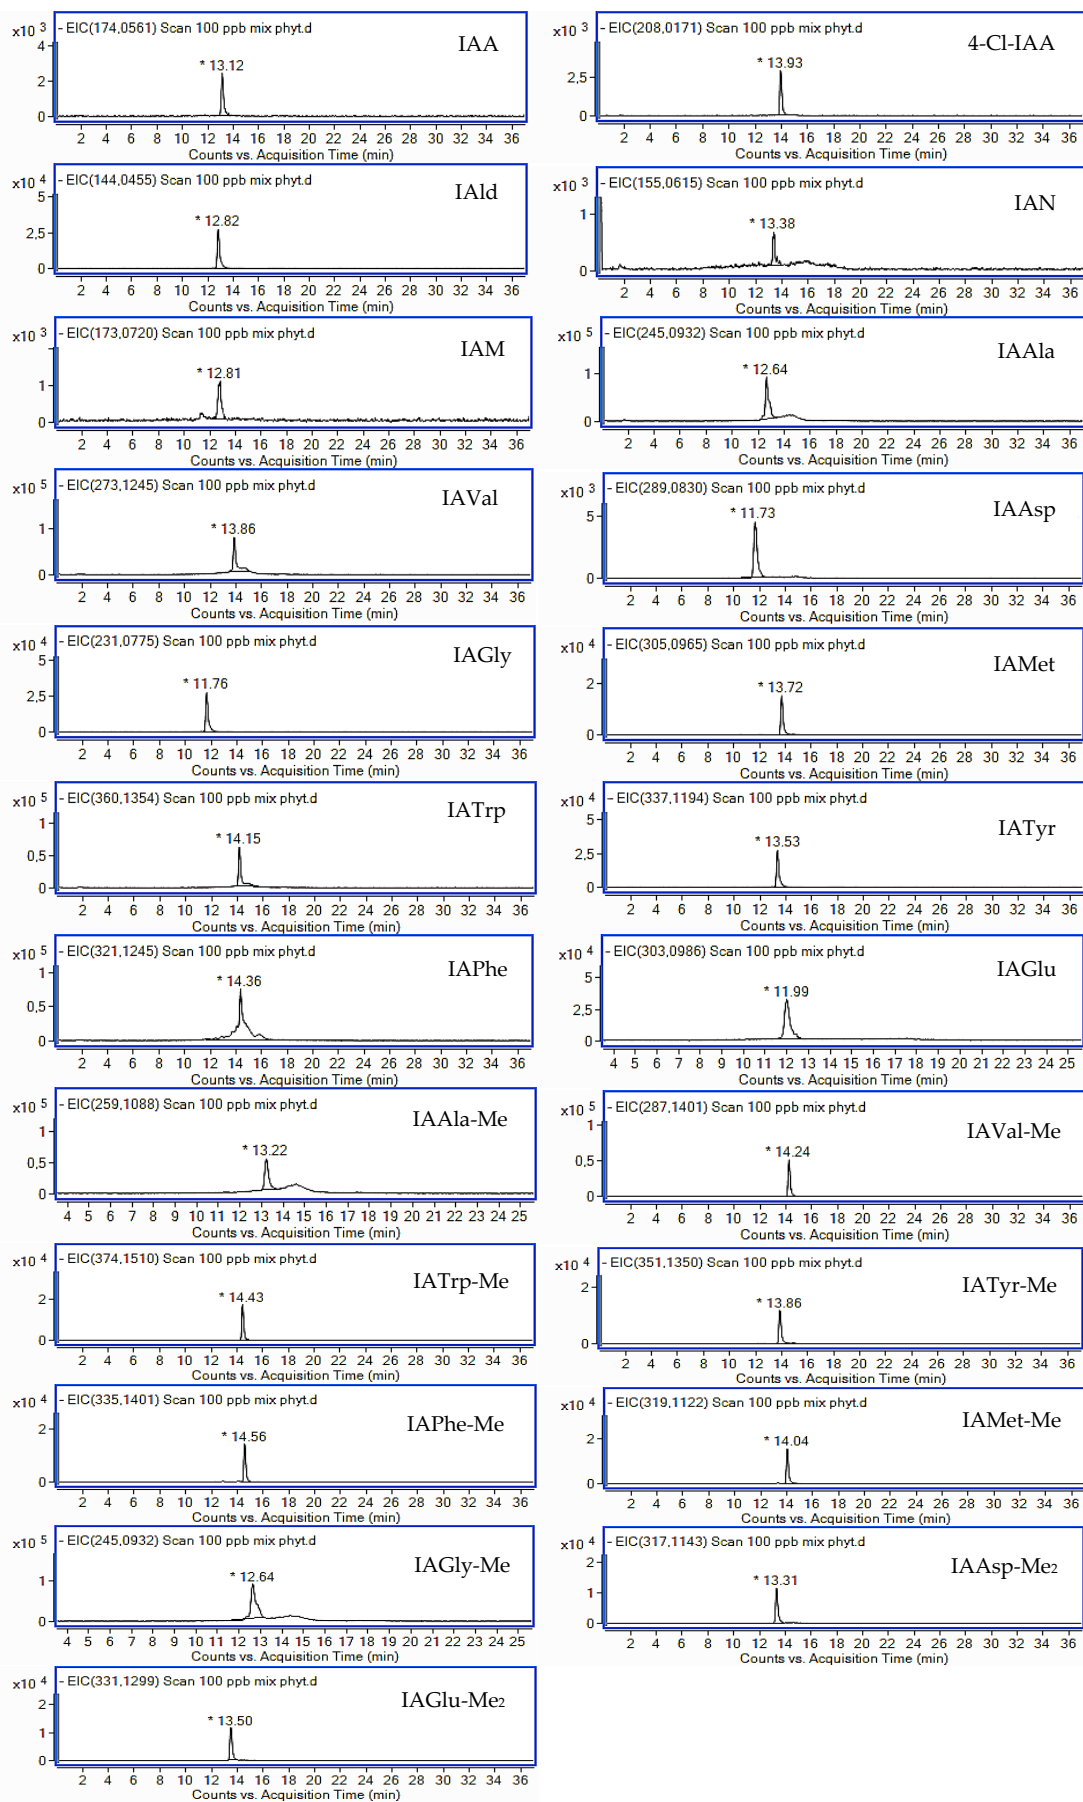

Fig. S24 Extracted ion chromatograms of studied compounds in negative ESI mode

**Table S1** MS data of the identification of studied compounds in *B. oleracea* var. *capitata*

| Compound name         | Elemental composition                                           | Rt <sup>1</sup> (min) | Positive ionization mode [M+H] <sup>+</sup> |                       |                     |            | Rt <sup>1</sup> (min) | Negative ionization mode [M-H] <sup>-</sup> |                       |                     |            |
|-----------------------|-----------------------------------------------------------------|-----------------------|---------------------------------------------|-----------------------|---------------------|------------|-----------------------|---------------------------------------------|-----------------------|---------------------|------------|
|                       |                                                                 |                       | Peak intensity                              | Calculated mass (m/z) | Observed mass (m/z) | Mass error |                       | Peak intensity                              | Calculated mass (m/z) | Observed mass (m/z) | Mass error |
| IAA                   | C <sub>10</sub> H <sub>9</sub> NO <sub>2</sub>                  | 13.10                 | 9.1x10 <sup>5</sup>                         | 176.0706              | 176.0706            | 0          | 13.12                 | 1.7x10 <sup>5</sup>                         | 174.0561              | 174.0556            | 2.9        |
| IAlD                  | C <sub>9</sub> H <sub>7</sub> NO <sub>2</sub>                   | 12.82                 | 1.6x10 <sup>6</sup>                         | 146.0600              | 146.0598            | 1.4        | 12.81                 | 2.5x10 <sup>6</sup>                         | 144.0455              | 144.0451            | 2.8        |
| IAN                   | C <sub>10</sub> H <sub>8</sub> N <sub>2</sub>                   | 13.39                 | 5.9x10 <sup>3</sup>                         | 157.0760              | 157.0764            | 2.5        | 13.38                 | 9.9x10 <sup>3</sup>                         | 155.0615              | 155.0618            | 1.9        |
| IAAla                 | C <sub>13</sub> H <sub>14</sub> N <sub>2</sub> O <sub>3</sub>   | 12.66                 | 2.3x10 <sup>3</sup>                         | 247.1077              | 247.1069            | 3.2        | 12.63                 | 5.0x10 <sup>3</sup>                         | 245.0932              | 245.0941            | 3.7        |
| IAlVal                | C <sub>15</sub> H <sub>18</sub> N <sub>2</sub> O <sub>3</sub>   | 13.87                 | 5.8x10 <sup>4</sup>                         | 275.1390              | 275.1391            | 0.4        | 13.86                 | 5.9x10 <sup>4</sup>                         | 273.1245              | 273.1245            | 0          |
| IAGly                 | C <sub>12</sub> H <sub>12</sub> N <sub>2</sub> O <sub>3</sub>   | 11.76                 | 3.5x10 <sup>2</sup>                         | 233.0921              | 233.0918            | 1.3        | 11.75                 | 8.2x10 <sup>2</sup>                         | 231.0775              | 231.0771            | 1.7        |
| IAMet                 | C <sub>15</sub> H <sub>18</sub> N <sub>2</sub> O <sub>3</sub> S | 13.70                 | 1.3x10 <sup>3</sup>                         | 307.1111              | 307.1120            | 2.9        | 13.73                 | 1.7x10 <sup>3</sup>                         | 305.0965              | 305.0975            | 3.3        |
| IATrp                 | C <sub>21</sub> H <sub>19</sub> N <sub>3</sub> O <sub>3</sub>   | 14.15                 | 2.0x10 <sup>3</sup>                         | 362.1499              | 362.1501            | 0.6        | 14.17                 | 2.3x10 <sup>3</sup>                         | 360.1354              | 360.1341            | 3.6        |
| IAPhe                 | C <sub>19</sub> H <sub>18</sub> N <sub>2</sub> O <sub>3</sub>   | 14.37                 | 1.4x10 <sup>3</sup>                         | 323.1390              | 323.1393            | 0.9        | 14.35                 | 2.1x10 <sup>3</sup>                         | 321.1245              | 321.1240            | 1.6        |
| IAAsp-Me <sub>2</sub> | C <sub>16</sub> H <sub>18</sub> N <sub>2</sub> O <sub>5</sub>   | 13.30                 | 3.0x10 <sup>3</sup>                         | 319.1288              | 319.1280            | 2.5        | 13.31                 | 3.2x10 <sup>3</sup>                         | 317.1143              | 317.1149            | 1.9        |
| IAPhe-Me              | C <sub>20</sub> H <sub>20</sub> N <sub>2</sub> O <sub>3</sub>   | 14.55                 | 1.0x10 <sup>3</sup>                         | 337.1547              | 337.1550            | 0.9        | 14.56                 | 2.1x10 <sup>3</sup>                         | 335.1401              | 335.1406            | 1.5        |
| IAGly-Me              | C <sub>13</sub> H <sub>14</sub> N <sub>2</sub> O <sub>3</sub>   | 12.66                 | 2.5x10 <sup>3</sup>                         | 247.1077              | 247.1069            | 3.2        | 12.63                 | 7.0x10 <sup>3</sup>                         | 245.0932              | 245.0935            | 1.2        |
| IAlVal-Me             | C <sub>16</sub> H <sub>20</sub> N <sub>2</sub> O <sub>3</sub>   | 14.24                 | 2.0x10 <sup>4</sup>                         | 289.1547              | 289.1547            | 0          | 14.22                 | 1.8x10 <sup>4</sup>                         | 287.1401              | 287.1406            | 1.7        |
| IATyr-Me              | C <sub>20</sub> H <sub>19</sub> N <sub>2</sub> O <sub>4</sub>   | 13.87                 | 7.2x10 <sup>4</sup>                         | 353.1496              | 353.1499            | 0.8        | 13.86                 | 7.0x10 <sup>4</sup>                         | 351.1350              | 351.1345            | 1.4        |
| IASer-Me              | C <sub>14</sub> H <sub>16</sub> N <sub>2</sub> O <sub>4</sub>   | 12.34                 | 6.2x10 <sup>4</sup>                         | 277.1183              | 277.1182            | 0.4        | 12.33                 | 6.8x10 <sup>4</sup>                         | 275.1037              | 275.1032            | 1.8        |
| IAGlu-Me <sub>2</sub> | C <sub>17</sub> H <sub>20</sub> N <sub>2</sub> O <sub>5</sub>   | 13.50                 | 2.1x10 <sup>4</sup>                         | 333.1445              | 333.1445            | 0          | 13.51                 | 3.0x10 <sup>4</sup>                         | 331.1299              | 331.1295            | 1.2        |

<sup>1</sup>Rt: Retention time

**Table S2** MS data of the identification of studied compounds in *B. oleracea* var. *rubra*

| Compound name | Elemental composition                                           | Rt <sup>1</sup> (min) | Positive ionization mode [M+H] <sup>+</sup> |                                |                              |            | Rt <sup>1</sup> (min) | Negative ionization mode [M-H] <sup>-</sup> |                                |                              |            |
|---------------|-----------------------------------------------------------------|-----------------------|---------------------------------------------|--------------------------------|------------------------------|------------|-----------------------|---------------------------------------------|--------------------------------|------------------------------|------------|
|               |                                                                 |                       | Peak intensity                              | Calculated mass ( <i>m/z</i> ) | Observed mass ( <i>m/z</i> ) | Mass error |                       | Peak intensity                              | Calculated mass ( <i>m/z</i> ) | Observed mass ( <i>m/z</i> ) | Mass error |
| IAA           | C <sub>10</sub> H <sub>9</sub> NO <sub>2</sub>                  | 13.11                 | 8.8x10 <sup>3</sup>                         | 176.0706                       | 176.0709                     | 1.7        | 13.12                 | 1.2x10 <sup>3</sup>                         | 174.0561                       | 174.0557                     | 2.3        |
| 4-Cl-IAA      | C <sub>10</sub> H <sub>8</sub> ClNO <sub>2</sub>                | 13.90                 | 2.5x10 <sup>2</sup>                         | 210.0316                       | 210.0321                     | 2.4        | 13.93                 | 7.3x10 <sup>2</sup>                         | 208.0171                       | 208.0165                     | 2.9        |
|               |                                                                 |                       | 1.8x10 <sup>2</sup>                         | 212.0287                       | 212.0297                     | 4.7        |                       | 6.5x10 <sup>2</sup>                         | 210.0142                       | 210.0149                     | 3.3        |
| IAlD          | C <sub>9</sub> H <sub>7</sub> NO <sub>2</sub>                   | 12.81                 | 2.5x10 <sup>4</sup>                         | 146.0600                       | 146.0605                     | 3.4        | 12.80                 | 4.3x10 <sup>4</sup>                         | 144.0455                       | 144.0450                     | 3.5        |
| IAN           | C <sub>10</sub> H <sub>8</sub> N <sub>2</sub>                   | 13.39                 | 2.9x10 <sup>2</sup>                         | 157.0760                       | 157.0755                     | 3.2        | 13.38                 | 9.5x10 <sup>2</sup>                         | 155.0615                       | 155.0621                     | 3.9        |
| IAAla         | C <sub>13</sub> H <sub>14</sub> N <sub>2</sub> O <sub>3</sub>   | 12.67                 | 6.4x10 <sup>2</sup>                         | 247.1077                       | 247.1078                     | 0.4        | 12.65                 | 9.1x10 <sup>2</sup>                         | 245.0932                       | 245.0944                     | 4.9        |
| IAMet         | C <sub>15</sub> H <sub>18</sub> N <sub>2</sub> O <sub>3</sub> S | 13.72                 | 5.2x10 <sup>3</sup>                         | 307.1111                       | 307.1116                     | 1.6        | 13.70                 | 6.0x10 <sup>3</sup>                         | 305.0965                       | 305.0972                     | 2.3        |
| IATrp         | C <sub>21</sub> H <sub>19</sub> N <sub>3</sub> O <sub>3</sub>   | 14.14                 | 2.3x10 <sup>2</sup>                         | 362.1499                       | 362.1511                     | 3.3        | 14.12                 | 3.0x10 <sup>2</sup>                         | 360.1354                       | 360.1360                     | 1.7        |
| IAPhe         | C <sub>19</sub> H <sub>18</sub> N <sub>2</sub> O <sub>3</sub>   | 14.37                 | 2.5x10 <sup>3</sup>                         | 323.1390                       | 323.1399                     | 2.8        | 14.35                 | 3.3x10 <sup>3</sup>                         | 321.1245                       | 321.1238                     | 2.2        |
| IAGly-Me      | C <sub>13</sub> H <sub>14</sub> N <sub>2</sub> O <sub>3</sub>   | 12.66                 | 2.0x10 <sup>3</sup>                         | 247.1077                       | 247.1088                     | 4.5        | 12.67                 | 7.1x10 <sup>3</sup>                         | 245.0932                       | 245.0939                     | 2.9        |
| IASer-Me      | C <sub>14</sub> H <sub>16</sub> N <sub>2</sub> O <sub>4</sub>   | 12.35                 | 1.7x10 <sup>3</sup>                         | 277.1183                       | 277.1191                     | 2.9        | 12.33                 | 1.9x10 <sup>3</sup>                         | 275.1037                       | 275.1025                     | 4.4        |
| IVal-Me       | C <sub>16</sub> H <sub>20</sub> N <sub>2</sub> O <sub>3</sub>   | 14.22                 | 8.1x10 <sup>2</sup>                         | 289.1547                       | 289.1545                     | 0.7        | 14.21                 | 8.4x10 <sup>2</sup>                         | 287.1401                       | 287.1408                     | 2.4        |

<sup>1</sup>Rt: Retention time

**Table S3** MS data of the identification of studied compounds in *B. rapa* subsp. *rapifera*

| Compound name | Elemental composition                                         | Rt <sup>1</sup> (min) | Positive ionization mode [M+H] <sup>+</sup> |            |            |       | Rt <sup>1</sup> (min) | Negative ionization mode [M-H] <sup>-</sup> |            |            |       |
|---------------|---------------------------------------------------------------|-----------------------|---------------------------------------------|------------|------------|-------|-----------------------|---------------------------------------------|------------|------------|-------|
|               |                                                               |                       | Peak                                        | Calculated | Observed   | Mass  |                       | Peak                                        | Calculated | Observed   | Mass  |
|               |                                                               |                       | intensity                                   | mass (m/z) | mass (m/z) | error |                       | intensity                                   | mass (m/z) | mass (m/z) | error |
| IAA           | C <sub>10</sub> H <sub>9</sub> NO <sub>2</sub>                | 13.13                 | 8.9x10 <sup>4</sup>                         | 176.0706   | 176.0709   | 1.7   | 13.12                 | 9.6x10 <sup>3</sup>                         | 174.0561   | 174.0556   | 2.9   |
| IAld          | C <sub>9</sub> H <sub>7</sub> NO <sub>2</sub>                 | 12.82                 | 6.9x10 <sup>4</sup>                         | 146.0600   | 146.0603   | 2.1   | 12.83                 | 7.5x10 <sup>4</sup>                         | 144.0455   | 144.0453   | 1.4   |
| IAN           | C <sub>10</sub> H <sub>8</sub> N <sub>2</sub>                 | 13.37                 | 2.5x10 <sup>2</sup>                         | 157.0760   | 157.0755   | 3.2   | 13.38                 | 8.0x10 <sup>2</sup>                         | 155.0615   | 155.0615   | 0     |
| IAAla         | C <sub>13</sub> H <sub>14</sub> N <sub>2</sub> O <sub>3</sub> | 12.64                 | 2.9x10 <sup>3</sup>                         | 247.1077   | 247.1082   | 2.0   | 12.66                 | 6.6x10 <sup>3</sup>                         | 245.0932   | 245.0930   | 0.8   |
| IAVal         | C <sub>15</sub> H <sub>18</sub> N <sub>2</sub> O <sub>3</sub> | 13.87                 | 1.5x10 <sup>3</sup>                         | 275.1390   | 275.1391   | 0.4   | 13.88                 | 1.9x10 <sup>3</sup>                         | 273.1245   | 273.1238   | 2.6   |
| IATrp         | C <sub>21</sub> H <sub>19</sub> N <sub>3</sub> O <sub>3</sub> | 14.16                 | 5.3x10 <sup>2</sup>                         | 362.1499   | 362.1516   | 4.7   | 14.14                 | 6.0x10 <sup>2</sup>                         | 360.1354   | 360.1362   | 2.2   |
| IAPhe         | C <sub>19</sub> H <sub>18</sub> N <sub>2</sub> O <sub>3</sub> | 14.38                 | 2.0x10 <sup>4</sup>                         | 323.1390   | 323.1397   | 2.2   | 14.33                 | 3.8x10 <sup>4</sup>                         | 321.1245   | 321.1232   | 4.0   |
| IAAsp         | C <sub>14</sub> H <sub>14</sub> N <sub>2</sub> O <sub>5</sub> | 11.70                 | 1.1x10 <sup>3</sup>                         | 291.0975   | 291.0969   | 2.1   | 11.74                 | 1.5x10 <sup>3</sup>                         | 289.0830   | 289.0839   | 3.1   |
| IAGlu         | C <sub>15</sub> H <sub>16</sub> N <sub>2</sub> O <sub>5</sub> | 11.98                 | 1.8x10 <sup>3</sup>                         | 305.1132   | 305.1126   | 2.0   | 11.97                 | 4.9x10 <sup>3</sup>                         | 303.0986   | 303.0989   | 1.0   |
| IATyr-Me      | C <sub>20</sub> H <sub>19</sub> N <sub>2</sub> O <sub>4</sub> | 13.88                 | 1.6x10 <sup>3</sup>                         | 353.1496   | 353.1491   | 1.4   | 13.86                 | 1.2x10 <sup>3</sup>                         | 351.1350   | 351.1340   | 2.8   |
| IAAla-Me      | C <sub>14</sub> H <sub>16</sub> N <sub>2</sub> O <sub>3</sub> | 13.22                 | 1.0x10 <sup>4</sup>                         | 261.1234   | 261.1231   | 1.1   | 13.21                 | 3.4x10 <sup>4</sup>                         | 259.1088   | 259.1080   | 3.1   |
| IAGly-Me      | C <sub>13</sub> H <sub>14</sub> N <sub>2</sub> O <sub>3</sub> | 12.64                 | 1.1x10 <sup>3</sup>                         | 247.1077   | 247.1088   | 4.5   | 12.66                 | 5.7x10 <sup>3</sup>                         | 245.0932   | 245.0927   | 2.0   |
| IAVal-Me      | C <sub>16</sub> H <sub>20</sub> N <sub>2</sub> O <sub>3</sub> | 14.23                 | 3.6x10 <sup>3</sup>                         | 289.1547   | 289.1548   | 0.3   | 14.25                 | 4.7x10 <sup>3</sup>                         | 287.1401   | 287.1406   | 1.7   |
| IASer-Me      | C <sub>14</sub> H <sub>16</sub> N <sub>2</sub> O <sub>4</sub> | 12.34                 | 9.4x10 <sup>3</sup>                         | 277.1183   | 277.1184   | 0.4   | 12.33                 | 9.9x10 <sup>3</sup>                         | 275.1037   | 275.1035   | 0.7   |

<sup>1</sup>Rt: Retention time

**Table S4** MS data of the identification of studied compounds in *B. oleracea* var. *botrytis* cv. zarka

| Compound name | Elemental composition                                         | Rt <sup>1</sup> (min) | Positive ionization mode [M+H] <sup>+</sup> |                       |                     |            | Rt <sup>1</sup> (min) | Negative ionization mode [M-H] <sup>-</sup> |                       |                     |            |
|---------------|---------------------------------------------------------------|-----------------------|---------------------------------------------|-----------------------|---------------------|------------|-----------------------|---------------------------------------------|-----------------------|---------------------|------------|
|               |                                                               |                       | Peak intensity                              | Calculated mass (m/z) | Observed mass (m/z) | Mass error |                       | Peak intensity                              | Calculated mass (m/z) | Observed mass (m/z) | Mass error |
| IAA           | C <sub>10</sub> H <sub>9</sub> NO <sub>2</sub>                | 13.11                 | 2.6x10 <sup>5</sup>                         | 176.0706              | 176.0704            | 1.1        | 13.11                 | 3.0x10 <sup>4</sup>                         | 174.0561              | 174.0557            | 2.3        |
| IAld          | C <sub>9</sub> H <sub>7</sub> NO <sub>2</sub>                 | 13.95                 | 3.8x10 <sup>5</sup>                         | 146.0600              | 146.0601            | 0.7        | 13.94                 | 4.7x10 <sup>5</sup>                         | 144.0455              | 144.0450            | 3.5        |
| IAN           | C <sub>10</sub> H <sub>8</sub> N <sub>2</sub>                 | 13.39                 | 1.8x10 <sup>3</sup>                         | 157.0760              | 157.0768            | 5.1        | 13.36                 | 6.0x10 <sup>2</sup>                         | 155.0615              | 155.0613            | 1.3        |
| IAAla         | C <sub>13</sub> H <sub>14</sub> N <sub>2</sub> O <sub>3</sub> | 12.62                 | 2.5x10 <sup>4</sup>                         | 247.1077              | 247.1087            | 4.0        | 12.65                 | 5.9x10 <sup>4</sup>                         | 245.0932              | 245.0944            | 4.9        |
| IAla          | C <sub>15</sub> H <sub>18</sub> N <sub>2</sub> O <sub>3</sub> | 13.89                 | 3.3x10 <sup>5</sup>                         | 275.1390              | 275.1392            | 0.7        | 13.88                 | 3.5x10 <sup>5</sup>                         | 273.1245              | 273.1236            | 3.3        |
| IATrp         | C <sub>21</sub> H <sub>19</sub> N <sub>3</sub> O <sub>3</sub> | 14.15                 | 1.8x10 <sup>3</sup>                         | 362.1499              | 362.1505            | 1.7        | 14.11                 | 1.9x10 <sup>3</sup>                         | 360.1354              | 360.1354            | 0          |
| IAGly-Me      | C <sub>13</sub> H <sub>14</sub> N <sub>2</sub> O <sub>3</sub> | 12.62                 | 2.8x10 <sup>3</sup>                         | 247.1077              | 247.1086            | 3.6        | 12.65                 | 7.9x10 <sup>3</sup>                         | 245.0932              | 245.0928            | 1.6        |

<sup>1</sup>Rt: Retention time

**Table S5** MS data of the identification of studied compounds in *B. oleracea* var. *italica* cv. calabrese

| Compound name | Elemental composition                                         | Rt <sup>1</sup> (min) | Positive ionization mode [M+H] <sup>+</sup> |            |            |       | Rt <sup>1</sup> (min) | Negative ionization mode [M-H] <sup>-</sup> |            |            |       |
|---------------|---------------------------------------------------------------|-----------------------|---------------------------------------------|------------|------------|-------|-----------------------|---------------------------------------------|------------|------------|-------|
|               |                                                               |                       | Peak                                        | Calculated | Observed   | Mass  |                       | Peak                                        | Calculated | Observed   | Mass  |
|               |                                                               |                       | intensity                                   | mass (m/z) | mass (m/z) | error |                       | intensity                                   | mass (m/z) | mass (m/z) | error |
| IAA           | C <sub>10</sub> H <sub>9</sub> NO <sub>2</sub>                | 13.09                 | 2.6x10 <sup>5</sup>                         | 176.0706   | 176.0704   | 1.1   | 13.11                 | 3.9x10 <sup>4</sup>                         | 174.0561   | 174.0557   | 2.3   |
| IAld          | C <sub>9</sub> H <sub>7</sub> NO <sub>2</sub>                 | 12.81                 | 5.0x10 <sup>5</sup>                         | 146.0600   | 146.0602   | 1.4   | 12.80                 | 6.7x10 <sup>5</sup>                         | 144.0455   | 144.0452   | 2.1   |
| IAN           | C <sub>10</sub> H <sub>8</sub> N <sub>2</sub>                 | 13.39                 | 1.4x10 <sup>3</sup>                         | 157.0760   | 157.0759   | 0.6   | 13.36                 | 6.3x10 <sup>3</sup>                         | 155.0615   | 155.0612   | 1.9   |
| IAAla         | C <sub>13</sub> H <sub>14</sub> N <sub>2</sub> O <sub>3</sub> | 12.63                 | 2.1x10 <sup>4</sup>                         | 247.1077   | 247.1078   | 0.4   | 12.66                 | 6.5x10 <sup>4</sup>                         | 245.0932   | 245.0931   | 0.4   |
| IVal          | C <sub>15</sub> H <sub>18</sub> N <sub>2</sub> O <sub>3</sub> | 13.85                 | 2.0x10 <sup>4</sup>                         | 275.1390   | 275.1392   | 0.7   | 13.88                 | 3.4x10 <sup>3</sup>                         | 273.1245   | 273.1234   | 4.0   |
| IATrp         | C <sub>21</sub> H <sub>19</sub> N <sub>3</sub> O <sub>3</sub> | 14.14                 | 5.2x10 <sup>3</sup>                         | 362.1499   | 362.1500   | 0.3   | 14.15                 | 6.0x10 <sup>3</sup>                         | 360.1354   | 360.1345   | 2.5   |
| IAPhe         | C <sub>19</sub> H <sub>18</sub> N <sub>2</sub> O <sub>3</sub> | 14.36                 | 6.7x10 <sup>2</sup>                         | 323.1390   | 323.1399   | 2.8   | 14.37                 | 7.7x10 <sup>2</sup>                         | 321.1245   | 321.1241   | 1.2   |
| IAGlu         | C <sub>15</sub> H <sub>16</sub> N <sub>2</sub> O <sub>5</sub> | 11.98                 | 5.0x10 <sup>3</sup>                         | 305.1132   | 305.1144   | 3.9   | 11.99                 | 9.4x10 <sup>3</sup>                         | 303.0986   | 303.0985   | 0.3   |
| IAGly-Me      | C <sub>13</sub> H <sub>14</sub> N <sub>2</sub> O <sub>3</sub> | 12.63                 | 1.3x10 <sup>2</sup>                         | 247.1077   | 247.1074   | 1.2   | 12.66                 | 5.5x10 <sup>2</sup>                         | 245.0932   | 245.0939   | 2.9   |
| IAAla-Me      | C <sub>14</sub> H <sub>16</sub> N <sub>2</sub> O <sub>3</sub> | 13.20                 | 3.0x10 <sup>3</sup>                         | 261.1234   | 261.1233   | 0.4   | 13.23                 | 6.9x10 <sup>3</sup>                         | 259.1088   | 259.1092   | 1.5   |
| IVal-Me       | C <sub>16</sub> H <sub>20</sub> N <sub>2</sub> O <sub>3</sub> | 14.24                 | 2.0x10 <sup>3</sup>                         | 289.1547   | 289.1550   | 1.0   | 14.23                 | 1.0x10 <sup>3</sup>                         | 287.1401   | 287.1397   | 1.4   |
| IASer-Me      | C <sub>14</sub> H <sub>16</sub> N <sub>2</sub> O <sub>4</sub> | 12.34                 | 3.2x10 <sup>3</sup>                         | 277.1183   | 277.1183   | 0     | 12.36                 | 3.5x10 <sup>3</sup>                         | 275.1037   | 275.1043   | 2.2   |

<sup>1</sup>Rt: Retention time



**Table S6** MS data of the identification of studied compounds in *B. oleracea* var. *italica* cv. *violleto*

| Compound name | Elemental composition                                         | Rt <sup>1</sup> (min) | Positive ionization mode [M+H] <sup>+</sup> |            |            |       | Rt <sup>1</sup> (min) | Negative ionization mode [M-H] <sup>-</sup> |            |            |       |
|---------------|---------------------------------------------------------------|-----------------------|---------------------------------------------|------------|------------|-------|-----------------------|---------------------------------------------|------------|------------|-------|
|               |                                                               |                       | Peak                                        | Calculated | Observed   | Mass  |                       | Peak                                        | Calculated | Observed   | Mass  |
|               |                                                               |                       | intensity                                   | mass (m/z) | mass (m/z) | error |                       | intensity                                   | mass (m/z) | mass (m/z) | error |
| IAA           | C <sub>10</sub> H <sub>9</sub> NO <sub>2</sub>                | 13.10                 | 1.1x10 <sup>6</sup>                         | 176.0706   | 176.0700   | 3.4   | 13.11                 | 1.3x10 <sup>5</sup>                         | 174.0561   | 174.0556   | 2.9   |
| IAld          | C <sub>9</sub> H <sub>7</sub> NO <sub>2</sub>                 | 12.82                 | 3.9x10 <sup>5</sup>                         | 146.0600   | 146.0598   | 1.4   | 12.80                 | 4.8x10 <sup>5</sup>                         | 144.0455   | 144.0453   | 1.4   |
| IAN           | C <sub>10</sub> H <sub>8</sub> N <sub>2</sub>                 | 13.39                 | 2.0x10 <sup>3</sup>                         | 157.0760   | 157.0764   | 2.5   | 13.38                 | 8.2x10 <sup>3</sup>                         | 155.0615   | 155.0615   | 0     |
| IAM           | C <sub>10</sub> H <sub>10</sub> N <sub>2</sub> O              | 12.80                 | 7.4x10 <sup>3</sup>                         | 175.0866   | 175.0870   | 2.3   | 12.79                 | 1.5x10 <sup>3</sup>                         | 173.0720   | 173.0724   | 2.3   |
| IAAla         | C <sub>13</sub> H <sub>14</sub> N <sub>2</sub> O <sub>3</sub> | 12.67                 | 4.1x10 <sup>3</sup>                         | 247.1077   | 247.1076   | 0.4   | 12.65                 | 8.8x10 <sup>3</sup>                         | 245.0932   | 245.0937   | 2.0   |
| IVal          | C <sub>15</sub> H <sub>18</sub> N <sub>2</sub> O <sub>3</sub> | 13.86                 | 3.4x10 <sup>4</sup>                         | 275.1390   | 275.1391   | 0.4   | 13.86                 | 3.8x10 <sup>4</sup>                         | 273.1245   | 273.1249   | 1.5   |
| IATrp         | C <sub>21</sub> H <sub>19</sub> N <sub>3</sub> O <sub>3</sub> | 14.14                 | 3.2x10 <sup>4</sup>                         | 362.1499   | 362.1514   | 4.1   | 14.13                 | 3.0x10 <sup>4</sup>                         | 360.1354   | 360.1356   | 0.6   |
| IASer         | C <sub>13</sub> H <sub>14</sub> N <sub>2</sub> O <sub>4</sub> | 11.29                 | 1.0x10 <sup>2</sup>                         | 263.1026   | 263.1020   | 2.3   | 11.28                 | 1.6x10 <sup>2</sup>                         | 261.0881   | 261.0890   | 3.4   |
| IAPhe         | C <sub>19</sub> H <sub>18</sub> N <sub>2</sub> O <sub>3</sub> | 14.36                 | 3.8x10 <sup>4</sup>                         | 323.1390   | 323.1401   | 3.4   | 14.38                 | 4.5x10 <sup>4</sup>                         | 321.1245   | 321.1258   | 4.0   |
| IVal-Me       | C <sub>16</sub> H <sub>20</sub> N <sub>2</sub> O <sub>3</sub> | 14.28                 | 2.0x10 <sup>3</sup>                         | 289.1547   | 289.1545   | 0.7   | 14.24                 | 4.6x10 <sup>3</sup>                         | 287.1401   | 287.1405   | 1.4   |
| IATyr-Me      | C <sub>20</sub> H <sub>19</sub> N <sub>2</sub> O <sub>4</sub> | 13.89                 | 1.5x10 <sup>3</sup>                         | 353.1496   | 353.1487   | 2.5   | 13.87                 | 1.1x10 <sup>3</sup>                         | 351.1350   | 351.1341   | 2.6   |
| IASer-Me      | C <sub>14</sub> H <sub>16</sub> N <sub>2</sub> O <sub>4</sub> | 12.33                 | 3.3x10 <sup>4</sup>                         | 277.1183   | 277.1187   | 1.4   | 12.32                 | 5.0x10 <sup>4</sup>                         | 275.1037   | 275.1031   | 2.2   |

<sup>1</sup>Rt: Retention time

**Table S7** MS data of the identification of studied compounds in *R. raphanistrum* subsp. *sativus*

| Compound name | Elemental composition                                         | Rt <sup>1</sup> (min) | Positive ionization mode [M+H] <sup>+</sup> |                                                |                     |                     | Rt <sup>1</sup> (min) | Negative ionization mode [M-H] <sup>-</sup> |                       |                     |            |
|---------------|---------------------------------------------------------------|-----------------------|---------------------------------------------|------------------------------------------------|---------------------|---------------------|-----------------------|---------------------------------------------|-----------------------|---------------------|------------|
|               |                                                               |                       | Peak intensity                              | Calculated mass (m/z)                          | Observed mass (m/z) | Mass error          |                       | Peak intensity                              | Calculated mass (m/z) | Observed mass (m/z) | Mass error |
|               |                                                               |                       | IAA                                         | C <sub>10</sub> H <sub>9</sub> NO <sub>2</sub> | 13.12               | 2.3x10 <sup>5</sup> |                       | 176.0706                                    | 175.0705              | 0.6                 | 13.11      |
| IAlD          | C <sub>9</sub> H <sub>7</sub> NO <sub>2</sub>                 | 12.80                 | 8.7x10 <sup>4</sup>                         | 146.0600                                       | 146.0599            | 0.7                 | 12.79                 | 9.5x10 <sup>4</sup>                         | 144.0455              | 144.0452            | 2.1        |
| IAN           | C <sub>10</sub> H <sub>8</sub> N <sub>2</sub>                 | 13.37                 | 1.7x10 <sup>2</sup>                         | 157.0760                                       | 157.0767            | 4.5                 | 13.35                 | 7.0x10 <sup>2</sup>                         | 155.0615              | 155.0622            | 4.5        |
| 4-Cl-IAA      | C <sub>10</sub> H <sub>8</sub> ClNO <sub>2</sub>              | 13.91                 | 1.1x10 <sup>2</sup>                         | 210.0316                                       | 210.0320            | 1.9                 | 13.90                 | 6.0x10 <sup>2</sup>                         | 208.0171              | 208.0178            | 3.4        |
|               |                                                               |                       | 0.4x10 <sup>2</sup>                         | 212.0287                                       | 212.0280            | 3.3                 |                       | 5.3x10 <sup>2</sup>                         | 210.0142              | 210.0133            | 4.3        |
| IAM           | C <sub>10</sub> H <sub>10</sub> N <sub>2</sub> O              | 12.81                 | 8.1x10 <sup>2</sup>                         | 175.0866                                       | 175.0861            | 2.9                 | 12.82                 | 1.4x10 <sup>2</sup>                         | 173.0720              | 173.0724            | 2.3        |
| IAAla         | C <sub>13</sub> H <sub>14</sub> N <sub>2</sub> O <sub>3</sub> | 12.64                 | 4.7x10 <sup>4</sup>                         | 247.1077                                       | 247.1075            | 0.8                 | 12.65                 | 8.0x10 <sup>4</sup>                         | 245.0932              | 245.0922            | 4.1        |
| IAlVal        | C <sub>15</sub> H <sub>18</sub> N <sub>2</sub> O <sub>3</sub> | 13.85                 | 1.4x10 <sup>4</sup>                         | 275.1390                                       | 275.1388            | 0.7                 | 13.87                 | 4.4x10 <sup>4</sup>                         | 273.1245              | 273.1245            | 0          |
| IAGly         | C <sub>12</sub> H <sub>12</sub> N <sub>2</sub> O <sub>3</sub> | 11.74                 | 1.6x10 <sup>3</sup>                         | 233.0921                                       | 233.0928            | 3.0                 | 11.76                 | 6.2x10 <sup>3</sup>                         | 231.0775              | 231.0772            | 1.3        |
| IATrp         | C <sub>21</sub> H <sub>19</sub> N <sub>3</sub> O <sub>3</sub> | 14.16                 | 1.7x10 <sup>3</sup>                         | 362.1499                                       | 362.1499            | 0                   | 14.15                 | 1.6x10 <sup>3</sup>                         | 360.1354              | 360.1342            | 3.3        |
| IATyr         | C <sub>19</sub> H <sub>18</sub> N <sub>2</sub> O <sub>4</sub> | 13.54                 | 1.3x10 <sup>3</sup>                         | 339.1339                                       | 339.1344            | 1.5                 | 13.53                 | 1.4x10 <sup>3</sup>                         | 337.1194              | 337.1197            | 0.9        |
| IASer         | C <sub>13</sub> H <sub>14</sub> N <sub>2</sub> O <sub>4</sub> | 11.29                 | 1.6x10 <sup>3</sup>                         | 263.1026                                       | 263.1029            | 1.1                 | 11.29                 | 1.9x10 <sup>3</sup>                         | 261.0881              | 261.0884            | 1.1        |
| IAPhe         | C <sub>19</sub> H <sub>18</sub> N <sub>2</sub> O <sub>3</sub> | 14.37                 | 1.9x10 <sup>3</sup>                         | 323.1390                                       | 323.1392            | 0.6                 | 14.39                 | 2.8x10 <sup>3</sup>                         | 321.1245              | 321.1255            | 3.1        |
| IAGlu         | C <sub>15</sub> H <sub>16</sub> N <sub>2</sub> O <sub>5</sub> | 11.97                 | 2.7x10 <sup>2</sup>                         | 305.1132                                       | 305.1137            | 1.6                 | 11.99                 | 7.2x10 <sup>2</sup>                         | 303.0986              | 303.0973            | 4.3        |
| IAAla-Me      | C <sub>14</sub> H <sub>16</sub> N <sub>2</sub> O <sub>3</sub> | 13.20                 | 3.8x10 <sup>3</sup>                         | 261.1234                                       | 261.1236            | 0.8                 | 13.19                 | 7.5x10 <sup>3</sup>                         | 259.1088              | 259.1090            | 0.8        |
| IAlVal-Me     | C <sub>16</sub> H <sub>20</sub> N <sub>2</sub> O <sub>3</sub> | 14.24                 | 1.8x10 <sup>5</sup>                         | 289.1547                                       | 289.1549            | 0.7                 | 14.24                 | 3.3x10 <sup>5</sup>                         | 287.1401              | 287.1394            | 2.4        |
| IAGly-Me      | C <sub>13</sub> H <sub>14</sub> N <sub>2</sub> O <sub>3</sub> | 12.64                 | 2.8x10 <sup>3</sup>                         | 247.1077                                       | 247.1089            | 4.9                 | 12.65                 | 6.9x10 <sup>3</sup>                         | 245.0932              | 245.0941            | 3.7        |
| IATyr-Me      | C <sub>20</sub> H <sub>19</sub> N <sub>2</sub> O <sub>4</sub> | 13.86                 | 1.5x10 <sup>3</sup>                         | 353.1496                                       | 353.1489            | 2.0                 | 13.87                 | 1.8x10 <sup>3</sup>                         | 351.1350              | 351.1342            | 2.3        |

|          |                                                               |       |                     |          |          |     |       |                     |          |          |     |
|----------|---------------------------------------------------------------|-------|---------------------|----------|----------|-----|-------|---------------------|----------|----------|-----|
| IASer-Me | C <sub>14</sub> H <sub>16</sub> N <sub>2</sub> O <sub>4</sub> | 12.32 | 2.9x10 <sup>3</sup> | 277.1183 | 277.1182 | 0.4 | 12.32 | 3.2x10 <sup>3</sup> | 275.1037 | 275.1044 | 2.5 |
|----------|---------------------------------------------------------------|-------|---------------------|----------|----------|-----|-------|---------------------|----------|----------|-----|

<sup>1</sup>Rt: Retention time

**Table S8** MS data of the identification of studied compounds in *E. sativa*

| Compound name | Elemental composition                                         | Rt <sup>1</sup> (min) | Positive ionization mode [M+H] <sup>+</sup> |                       |                     |            | Rt <sup>1</sup> (min) | Negative ionization mode [M-H] <sup>-</sup> |                       |                     |            |
|---------------|---------------------------------------------------------------|-----------------------|---------------------------------------------|-----------------------|---------------------|------------|-----------------------|---------------------------------------------|-----------------------|---------------------|------------|
|               |                                                               |                       | Peak intensity                              | Calculated mass (m/z) | Observed mass (m/z) | Mass error |                       | Peak intensity                              | Calculated mass (m/z) | Observed mass (m/z) | Mass error |
| IAA           | C <sub>10</sub> H <sub>9</sub> NO <sub>2</sub>                | 13.13                 | 1.7x10 <sup>4</sup>                         | 176.0706              | 176.0709            | 1.7        | 13.14                 | 1.2x10 <sup>3</sup>                         | 174.0561              | 174.0557            | 2.3        |
| IAld          | C <sub>9</sub> H <sub>7</sub> NO <sub>2</sub>                 | 12.83                 | 1.7x10 <sup>5</sup>                         | 146.0600              | 146.0596            | 2.7        | 12.82                 | 2.1x10 <sup>5</sup>                         | 144.0455              | 144.0451            | 2.8        |
| IAAla         | C <sub>13</sub> H <sub>14</sub> N <sub>2</sub> O <sub>3</sub> | 12.64                 | 5.0x10 <sup>3</sup>                         | 247.1077              | 247.1081            | 1.6        | 12.67                 | 8.1x10 <sup>3</sup>                         | 245.0932              | 245.0934            | 0.8        |
| IAGly         | C <sub>12</sub> H <sub>12</sub> N <sub>2</sub> O <sub>3</sub> | 11.79                 | 3.2x10 <sup>2</sup>                         | 233.0921              | 233.0928            | 3.0        | 11.80                 | 8.5x10 <sup>2</sup>                         | 231.0775              | 231.0780            | 2.2        |
| IVal-Me       | C <sub>16</sub> H <sub>20</sub> N <sub>2</sub> O <sub>3</sub> | 14.21                 | 3.8x10 <sup>3</sup>                         | 289.1547              | 289.1554            | 2.4        | 14.23                 | 7.2x10 <sup>3</sup>                         | 287.1401              | 287.1408            | 2.4        |
| IATyr-Me      | C <sub>20</sub> H <sub>19</sub> N <sub>2</sub> O <sub>4</sub> | 13.89                 | 7.5x10 <sup>3</sup>                         | 353.1496              | 353.1508            | 3.4        | 13.86                 | 7.9x10 <sup>3</sup>                         | 351.1350              | 351.1356            | 1.7        |
| IASer-Me      | C <sub>14</sub> H <sub>16</sub> N <sub>2</sub> O <sub>4</sub> | 12.34                 | 1.5x10 <sup>3</sup>                         | 277.1183              | 277.1190            | 2.5        | 12.32                 | 3.2x10 <sup>3</sup>                         | 275.1037              | 275.1031            | 2.2        |

<sup>1</sup>Rt: Retention time
